1 **TITLE: Amygdala input differentially influences prefrontal local field potential and single**  
2 **neuron encoding of reward-based decisions**

3  
4 **RUNNING TITLE:** Amygdala influence on ERPs and prefrontal neurons

5  
6 **AUTHORS:** Frederic M. Stoll<sup>1</sup>, Clayton P. Mosher<sup>1</sup>, Sarita Tamang<sup>1</sup>, Elisabeth A. Murray<sup>2</sup>, and Peter H.  
7 Rudebeck<sup>1</sup>

8  
9 **ADDRESS:**

10 <sup>1</sup> Icahn School of Medicine at Mount Sinai, One Gustave L. Levy Place, New York, NY, 10029, USA

11 <sup>2</sup> Section on the Neurobiology of Learning and Memory, Laboratory of Neuropsychology, Building 49,  
12 Suite 1B80, 49 Convent Drive, Bethesda, Maryland 20892, USA

13  
14 **CORRESPONDENCE SHOULD BE ADDRESSED TO:**

15 Dr. Peter H. Rudebeck

16 Icahn School of Medicine at Mount Sinai

17 One Gustave L. Levy Place

18 New York, NY, 10029, USA

19 Tel: +1 212 824-9307

20 E-mail: peter.rudebeck@mssm.edu

21  
22 **FIGURES** 6

23 **TABLES** 0

24 **PAGES** 39

25 **WORDS** Abstract: 197 of 250 words

26 Significance statement: 118 of 120 words

27 Introduction: 496 of 650 words

28 Discussion: 2,048 of 1500 words

29  
30  
31 **KEYWORDS:** Amygdala, reward, affect, emotion, orbitofrontal cortex, local field potential, medial  
32 prefrontal cortex, decision making, choices, valuation, outcome.

33  
34 **CONFLICT OF INTEREST:** None

35  
36 **ACKNOWLEDGEMENTS:** This work was supported by a National Institute of Mental Health BRAINS  
37 award to PHR (R01 MH110822), a young investigator grant from the Brain and Behavior Foundation  
38 (NARSAD) to PHR, a Philippe Foundation award to FMS, seed funds from the Icahn School of  
39 Medicine at Mount Sinai to PHR, and the Intramural Research Program of the NIMH. We thank Kevin  
40 Blomstrom, Kevin Fomalont and Joshua Ripple for assistance with data collection, and James Fellows,  
41 Ping Yu Chen and David Yu for help with surgery and histology.

42 **ABSTRACT**

43

44 Reward-guided behaviors require functional interaction between amygdala, orbital (OFC), and  
45 medial (MFC) divisions of prefrontal cortex, but the neural mechanisms underlying these  
46 interactions are unclear. Here, we used a decoding approach to analyze local field potentials  
47 (LFPs) recorded from OFC and MFC of monkeys engaged in a stimulus-choice task, before  
48 and after excitotoxic amygdala lesions. Whereas OFC LFP responses were strongly  
49 modulated by the amount of reward associated with each stimulus, MFC responses best  
50 represented which stimulus subjects decided to choose. This was counter to what we  
51 observed in the level of single neurons where their activity was closely associated with the  
52 value of the stimuli presented on each trial. After lesions of the amygdala, stimulus-reward  
53 value and choice encoding were reduced in OFC and MFC, respectively. However, while the  
54 lesion-induced decrease in OFC LFP encoding of stimulus-reward value mirrored changes in  
55 single neuron activity, reduced choice encoding in MFC LFPs was distinct from changes in  
56 single neuron activity. Thus, LFPs and single neurons represent different information required  
57 for decision-making in OFC and MFC. At the circuit-level, amygdala input to these two areas  
58 play a distinct role in stimulus-reward encoding in OFC and choice encoding in MFC.

59

60

61 **SIGNIFICANCE STATEMENT**

62

63 Dynamic interaction between amygdala, orbitofrontal (OFC) and medial frontal cortex (MFC) is  
64 required for adaptive foraging. To determine the nature of these neural mechanisms, we  
65 compared single neuron and local field potential responses (LFPs) in monkeys making reward-  
66 guided choices both before and after amygdala lesions. LFP responses in OFC best  
67 represented stimulus-reward values available on each trial, whereas MFC LFP responses  
68 were closely associated with monkeys' choices. By contrast, single neurons, in both areas  
69 primarily encoded stimulus-reward value. Removing amygdala input to OFC and MFC  
70 heightened these differences between encoding of task variable by LFPs and single neurons.  
71 Thus single neurons and LFPs in frontal cortex represent different aspects of decision-making  
72 and are differentially influenced by the amygdala.

73

## 74 INTRODUCTION

75 Interaction between the prefrontal cortex (PFC) and limbic system is required for normal  
76 patterns of affective behavior and cognition. In particular, reward-guided behaviors  
77 require functional interaction between the amygdala and the orbital and medial divisions of the  
78 PFC (OFC and MFC, respectively). For instance, lesions that disconnect the OFC and  
79 amygdala are associated with impairments in updating the value of rewards (Baxter et al.,  
80 2000). Similarly, disconnection of the MFC and amygdala leads to deficits in correctly  
81 weighting the costs and benefits of different courses of action (Floresco and Ghods-Sharifi,  
82 2007) as well as emotional responding (Felix-Ortiz et al., 2016). Disruption of functional  
83 interaction between the PFC and limbic system, most notably the amygdala, is also associated  
84 with a host of psychiatric disorders (Pezawas et al., 2005; Almeida et al., 2009; Dutta et al.,  
85 2014). Determining how these brain areas interact at the neural level when one of the nodes of  
86 the network is dysfunctional or damaged is therefore a key first step to understanding circuit-  
87 level interactions.

88 We previously showed that in monkeys, bilateral excitotoxic lesions of the amygdala  
89 attenuate reward-value signals of individual neurons recorded from OFC, but not MFC  
90 (Rudebeck et al., 2013). The response properties of single neurons, however, only reflect the  
91 local processing and output of an area (Einevoll et al., 2013). A more complete understanding  
92 of this network might be informed by considering population-level activity and the inputs to an  
93 area, which can be studied using local field potentials (LFPs). Indeed there is evidence that  
94 there are differences in the types of information encoded by single neurons and LFPs  
95 (Kreiman et al., 2006). For example, during a working memory task where object locations and  
96 features had to be held online, differences emerged between the information encoded in spike  
97 trains and LFPs in lateral frontal cortex (Lara and Wallis, 2014). In the context of the present  
98 data, we previously reported that stimulus-reward encoding in OFC was independent of  
99 concurrently presented options, suggesting that the activity of single neurons was not encoding  
100 the monkeys' choices (Rudebeck et al., 2013). However, it is possible that choices might be  
101 being encoded at the level of LFPs instead of the activity of single neurons in OFC and MFC.

102 To better determine the dynamics of reward-value and choice coding in the amygdala-  
103 MFC-OFC network, we analyzed LFPs recorded from the OFC and MFC in three monkeys  
104 engaged in a stimulus-choice task. Recordings were made both before and after excitotoxic

105 lesions of the amygdala. Specifically we looked for signals that were associated with encoding  
106 stimulus-reward associations and monkeys' choices and compared this to encoding by single  
107 neurons. Here we report that prior to lesions of the amygdala we could, mirroring the spike  
108 data, decode stimulus-reward values in OFC to a greater extent than MFC. By contrast, the  
109 choice that would ultimately be taken was more strongly encoded in MFC than OFC.  
110 Removing amygdala input led to reduced signals in OFC and MFC related to stimulus values  
111 and choices, respectively.

## 112 **METHODS**

### 113 **Subjects**

114 Three adult male rhesus macaques (*Macaca mulatta*), monkeys H, N and V, served as  
115 subjects; they weighed 8.5, 8.0 and 8.4 kg, respectively, at the beginning of training. Animals  
116 were pair housed when possible, kept on a 12-h light dark cycle and had access to food 24  
117 hours a day. Throughout training and testing each monkey's access to water was controlled for  
118 6 days per week. All procedures were reviewed and approved by the NIMH Animal Care and  
119 Use Committee.

120

### 121 **Apparatus**

122 Monkeys were trained to perform a two-choice visually guided task for fluid reward. All  
123 trial events and timing were controlled using the open source NIMH Cortex program  
124 (<ftp://helix.nih.gov/lsn/cortex/>). Eye position and pupil size were monitored and acquired at 60  
125 frames per second with an infrared oculometer (Arrington Research, Scottsdale, AZ).

126 During training and testing monkeys sat in a primate chair with their heads restrained.  
127 Directly in front of the chair, three buttons were spaced horizontally 7 cm apart (center to  
128 center). These buttons had embedded infrared sensors to detect contact.

129

### 130 **Task and behavior**

131 Three monkeys were trained to perform a choice task for fluid rewards. On each trial,  
132 monkeys had to press and hold a central button and then fixate a central light spot for 0.5–1.5  
133 s (**Fig. 1A**). Two visual stimuli, associated with different amounts of fluid reward, were then  
134 sequentially presented. The onset of the second stimulus (S2) followed the onset of the first  
135 (S1) by 1.0 s and, by random selection, one stimulus appeared to the left of the central spot  
136 and one appeared to the right. We presented the two stimuli for choice sequentially in an  
137 attempt to separate the valuation process of the individual items. Stimuli were randomly  
138 selected from a pool of ten stimuli (**Fig. 1A**). Monkeys had learned that each of the stimuli was  
139 associated with a fixed amount of fluid — 0.8, 0.4, 0.2, 0.1 or 0 ml of water — two stimuli for  
140 each quantity. A total of 14 pairs were tested (S1/S2 values): 0/0.1 ml, 0/0.2 ml, 0.1/0 ml,  
141 0.1/0.2 ml, 0.1/0.4 ml, 0.2/0 ml, 0.2/0.1 ml, 0.2/0.4 ml, 0.2/0.8 ml, 0.4/0.1 ml, 0.4/0.2 ml, 0.4/0.8  
142 ml, 0.8/0.2 ml, and 0.8/0.4 ml. All sessions also included pairs with stimuli associated with the

143 same reward values for S1 and S2 (i.e. 0.1/0.1 ml, 0.2/0.2 ml and 0.4/0.4 ml) on 10% of the  
144 trials. Given the limited number of these trials, they were not included in the present analyses.  
145 After a variable delay of 0.0–1.5 s, the central spot brightened as a “go” signal, and the  
146 monkeys could then choose between the two stimuli by reaching to the left or right response  
147 button. The amount of fluid reward corresponding to the chosen stimulus was delivered 0.5 s  
148 later.

149

### 150 **Surgical procedures, neural recordings, imaging and histological reconstruction**

151 For detailed information on surgical procedures, see Rudebeck et al. (2013). In brief,  
152 each monkey was implanted with a titanium head restraint device and then, in a separate  
153 surgery, a plastic recording chamber was placed over the exposed dura mater of the left frontal  
154 lobe. After the preoperative recordings were completed, MRI-guided bilateral excitotoxic  
155 lesions of the amygdala were made in each monkey.

156 Potentials from single neurons and local field potentials were recorded with tungsten  
157 microelectrodes (FHC, Inc. or Alpha Omega, 0.5-1.5 M $\Omega$  at 1 KHz) advanced by an 8-channel  
158 micromanipulator (NAN instruments, Nazareth, Israel) attached to the recording chamber.  
159 Spikes from putative single neurons were isolated online using a Plexon Multichannel  
160 Acquisition Processor and later verified with Plexon OffLine Sorter on the basis of principal-  
161 component analysis, visually differentiated waveforms and interspike intervals. Neurons were  
162 isolated before monkeys were engaged in any task. Other than the quality of isolation, there  
163 were no selection criteria for neurons. Local field potentials were recorded using the same  
164 system and digitized at 1kHz. Recordings were referenced on guide tubes containing the  
165 electrodes and in contact with the dura.

166 OFC recordings were made on the ventral surface of the frontal lobe between the lateral  
167 and medial orbital sulci, roughly corresponding to Walker’s areas 11 and 13. All OFC  
168 recordings were between +27 and +38 mm anterior to the interaural plane. Recording locations  
169 in MFC were primarily in the dorsal bank of the cingulate sulcus (areas 9 and 24), although  
170 some sites were in the ventral part of the fundus of the cingulate sulcus. MFC recordings were  
171 made between the anterior tip of the cingulate sulcus (approximately +38 mm) and +24 mm.

172 Both before and after lesions of the amygdala, recordings were made in overlapping  
173 regions in each of the three monkeys (**Fig. 1C**). Recording sites were verified by T1-weighted

174 MRI imaging of electrodes after recording sessions and by placing electrolytic marking lesions  
175 (15  $\mu$ A direct current for 25 seconds, electrode positive) at selected locations in OFC after  
176 recordings had been completed (see Rudebeck et al., 2013). At the conclusion of the study,  
177 monkeys were deeply anesthetized and transcardially perfused with saline (0.9%) followed by  
178 formalin. The brains were removed, sectioned in the coronal plane, Nissl-stained and mounted  
179 onto glass slides for visual inspection.

180 The extent and location of the amygdala lesions was assessed using T2-weighted MRI  
181 conducted within one week of each surgery (e.g. **Fig. 1B**, top row). Lesion volume was then  
182 confirmed from histology (e.g. **Fig. 1B**, bottom row). The locations and extents of the lesions  
183 were largely as intended. There was near complete cell loss in all nuclei in the amygdaloid  
184 complex (mean = 95.5%). Inadvertent damage was evident in the entorhinal and perirhinal  
185 cortex, portions of the ventral claustrum, and anterior hippocampus (see Rudebeck et al.,  
186 2013). Importantly, with the possible exception of the entorhinal cortex, this unintended  
187 damage was slight (e.g., extending less than 2 mm in antero-posterior extent) and asymmetric  
188 between the hemispheres. Finally, one monkey (Monkey N) sustained an infarction in the  
189 dorsal striatum, bilaterally. Overall, damage in all three monkeys consistently centered on the  
190 amygdala, bilaterally.

191

## 192 **Electrophysiological data processing**

193 Data analysis was performed offline using the FieldTrip toolbox (Oostenveld et al.,  
194 2011) and custom Matlab scripts (Matlab, MathWork Inc.).

195 Preoperatively, a total of 234 and 155 LFPs were recorded from 3 monkeys in the OFC  
196 and MFC respectively. Following the bilateral amygdala lesions, we recorded 324 and 204  
197 more LFPs in the OFC and MFC, respectively. To avoid biasing our results, we required a  
198 minimum of 5 trials for each possible pair of S1 and S2 values, and we did not include trials in  
199 which there was no delay between S2 presentation and the Go signal (i.e., delay needed to be  
200 at least 500 ms or more). A few recordings did not meet the trial number requirement and were  
201 therefore excluded from further analyses (PreOp: OFC=12/234, MFC=11/155 sites; PostOp:  
202 OFC=26/324, MFC=20/204 sites).

203

204

## 205 *Pre-processing*

206 Here, our analyses focused specifically on the event-related potentials (ERPs) evoked  
207 by stimuli presentation. We did not report data on possible oscillatory activities as no clear  
208 modulations have been observed apart from the direct ERP signature in the low frequency  
209 spectrum (data not shown). For each recorded site, the LFP signal was first band-pass filtered  
210 from 1 to 30 Hz and then aligned around S1 presentation (from -3 to +3 s). We then  
211 normalized the LFP signal for each individual trial relative to a baseline period (-0.6 to -0.1 s  
212 before S1 onset), and derived a z-score. Finally, we sub-sampled our dataset using a sliding  
213 window of 50 ms stepped in 10 ms increments.

214

## 215 *ERPs latency and amplitude*

216 The latency of the different ERP components was extracted for each trial by detecting  
217 peaks with amplitude greater than 0.3 sd and with a minimal distance restriction between 2  
218 consecutive peaks of 75 ms (using the Matlab function *findpeaks.m*). Latencies for negative  
219 components were considered only if they fell between 200 and 350 ms relative to stimulus  
220 onset, whilst latencies for the later positive components needed to be between 300 and 550  
221 ms. These time windows were defined based on the visual inspection of all the detected  
222 latencies. We then used Kruskal-Wallis (KW) tests to assess differences between conditions.

223 Finally, differences in ERP amplitudes between areas (OFC vs. MFC) or relative to  
224 amygdala lesions (PreOp vs. PostOp) were also extracted using KW tests at each time bin.

225

## 226 *ANOVA on individual LFPs*

227 To assess how the different factors of our task modulated the amplitude of the trial-by-  
228 trial ERP signals, we first fitted a sliding hierarchical ANOVA model to the normalized ERP  
229 activity of each recorded LFP. Our model included factors of S1 reward value (five levels), S2  
230 reward value (five levels), S1 identity (two levels), S2 identity (two levels) and S1 presentation  
231 side (two levels). S1 and S2 identity factors were nested within S1 and S2 reward value,  
232 respectively. P-values extracted for each factor were subjected to a specific threshold to  
233 account for multiple testing over time (see *Statistical procedures* below). To complement our  
234 time-resolved observations, we also extracted the overall number of significant sites for 3  
235 different periods: a reference period (REF: -1000 to 0 ms, relative to S1 onset), the S1 period



236 (0 to 1000 ms) and S2 period (1000 to 2000 ms). Finally, to extract the latency of stimulus  
237 value or stimulus side encoding, we detected the first significant time bin during the time period  
238 considered (S1 or S2 periods). As before, differences in latencies were evaluated using KW  
239 tests.

240

#### 241 *Statistical procedures applied to individual LFPs analyses*

242 Individual sites were considered as significantly encoding a task factor if they  
243 discriminated that factor for 6 consecutive bins (covering a time period of 100ms) with a  
244 threshold of  $p < 0.01$ . This threshold was applied to all time-resolved analyses (e.g. hierarchical  
245 ANOVA and KW test on ERP amplitude over time).

246 We also assessed statistical significance by computing two-tailed Chi-square tests with  
247 Yates' correction when testing for differences in the proportion of sites encoding a given factor,  
248 either when comparing areas (OFC vs. MFC) or periods (PreOp vs. PostOp).

249

#### 250 *Relationship to single neuron recordings*

251 We previously reported the encoding properties of the individual neurons recorded in  
252 this task (Rudebeck et al., 2013; PreOp: OFC=280; MFC=233; PostOp: OFC=317; MFC=237  
253 neurons). Here, we were able to assess whether there was a relationship between neurons  
254 and ERPs as the same analyses were applied with the two datasets. In particular, we tested  
255 whether neurons and ERPs recorded simultaneously on the same electrode (i.e., at a similar  
256 site) were modulated by the different factors in a similar manner. To do this, we extracted the  
257 proportion of sites where, based on the hierarchical ANOVAs, both neurons and ERPs showed  
258 significant encoding of S1 or S2 values. To test if these proportions were significant (e.g.,  
259 whether neurons recorded on an electrode showing significant ERP modulations were more  
260 likely, or not, to also encode the same factor), we used permutation testing, by shuffling the  
261 labels assigned to the different neurons (significant or not) 1000 times. This procedure enabled  
262 us to take into account the relative number of both significant LFP sites and neurons, and  
263 therefore avoid any confounds.

264 We also looked at the correlation between the variance explained by the S1 or S2  
265 values from the hierarchical ANOVAs in recordings where both neurons and ERPs (recorded  
266 on the same electrode) showed significant modulations.

267

268 *Population decoding of choices and stimulus reward values*

269 We applied multiple linear regressions to decode information from population ERP  
270 activity vectors in both regions. This method assesses the capability of a linear readout to  
271 extract a given response variable (e.g., choosing S1 or S2) from trial-by-trial ERP responses of  
272 the whole population. In this procedure, a Tikhonov regularization procedure was used to  
273 minimize the sum of squared errors and thus avoid overfitting by placing constraints on  
274 regression coefficients.

275

276 To extract an accurate estimate of the classifiers' performance, we included only sites  
277 with 3 repetitions of each of the 14 possible S1/S2 pairs. We also only included the same  
278 number of predictors (i.e., recording sites) for both areas, as well as for pre- and post-operative  
279 recordings. This was done so that we could directly compare the strength of coding between  
280 the different recording populations, as more predictors might spuriously increase the accuracy  
281 (see for example, Astrand et al., 2014). Applying these criteria meant that the datasets used to  
282 extract choice-predictive activity contained the ERP signals recorded at 47 randomly selected  
283 sites during 42 randomly selected trials. Our training set contained 2 instances of each  
284 possible pair (i.e., 28 trials), and our testing set contained the remaining third of the data (14  
285 trials). It is important to note that classifiers did not have any information relative to the S1 or  
286 S2 reward values, nor did it have information regarding S1/S2 pair identities. To determine the  
287 regularization parameter, we further subdivided the training partition to perform a 5-fold cross-  
288 validation procedure. The sum of squared errors (SSE) across the five folds was computed for  
289 each regularization parameter tested. The value with the lowest SSE was then selected and  
290 used to train the classifier on the whole training partition. We then tested the classifier on the  
291 remaining testing partition, which contained the 14 trials. This meant that the testing partition  
292 was never used during the optimization and/or training of the classifier. Given our under-  
293 sampling procedure, an unbiased readout of performance was extracted by randomly selecting  
294 trials and performing all computations 1000 times, which generated a vector of 1000 estimated  
295 choices for each of the 14 S1/S2 pairs. We then used the average choice binary output over  
296 these 1000 computations. Classifiers were trained and tested at each time bin.

297 Chance levels and statistical significance were defined using a permutation approach.

298 Specifically, we randomly permuted monkeys' choices 1000 times without removing the  
299 relationship between ERP signal and the different S1/S2 pairs and conducted the same  
300 decoding approach described above. Importantly, the temporal structure of the ERP signal  
301 also remained unaffected by the permutation procedure. All subsequent computations were  
302 done in a similar manner to that described above. Finally, classifiers' performances were  
303 averaged across the 14 S1/S2 pairs for each permutation and used to assess statistical  
304 significance.

305

306 The same analysis methods were also applied to the recordings of single neuron activity  
307 (OFC and MFC neurons, both before and after lesions). Here we used the activity of a  
308 subsample of 47 randomly selected neurons for each population of neurons from OFC and  
309 MFC to predict monkeys' choices. Just as we had done for the ERP analyses, described  
310 above, we first used the average firing rate for 50 ms bins each 10 ms step. With such time  
311 averaging, we were almost unable to decode choices from either OFC (PreOp=1/14 and  
312 PostOp=3/14 significantly decoded S1/S2 pairs) or MFC (PreOp=2/14 and PostOp=0/14).  
313 However, it is unclear if this null result was due to a limitation inherent to the nature of the  
314 signal (i.e., spiking activity is a point-process, as opposed to the continuous ERP signal) or a  
315 true absence of encoding. Our objective being the comparison between neuronal and ERP  
316 populations, we therefore reported the decoding performance using longer bins of 200 ms for  
317 neuronal populations, a common window size used to analyze neuronal activity (e.g.  
318 Rudebeck et al., 2013; Lara and Wallis, 2014; Stoll et al., 2016).

319

320 We report the results of our time-resolved approach, but also after averaging 2 time  
321 periods ( $t_1$ , from 300 to 400 ms; and  $t_2$ , 1250 to 1350 ms, relative to S1 onset). These time  
322 windows were defined to match the ERPs components and based on the overall decoding  
323 performance. Statistical estimates for these time windows were extracted by averaging the  
324 results of the 1000 permutations over time in a similar manner. Differences between recorded  
325 populations were assessed using Chi-square tests with Yates' corrections. We used a  
326 threshold of  $p < 0.05$  after correcting for multiple tests.

327 To further compare the decoding performance for the different conditions, we fitted a  
328 mixed-effect logistic regression on the output of the classifiers (average number of S1 choices

329 out of the 1000 permutations during time bin  $t_2$ ). The full model included fixed-effect for all  
330 three categorical fixed-effect factors (Type: neurons vs. LFPs; Area: OFC vs. MFC, Surgery:  
331 PreOp vs. PostOp) and all interactions. Also, S1/S2 pairs were dummy-coded and included as  
332 a random-effect factor, allowing changes in intercept (i.e., choosing more S1 or S2 depending  
333 on their respective values). Thus, this model compared the overall performance of the  
334 classifiers independently of the S1/S2 pair considered. Model coefficients were derived by  
335 maximum likelihood estimation using Laplace approximation. We report the output from the full  
336 model in the results given that a similar model without the 3-way interaction (Type x Area x  
337 Surgery) was significantly less adapted to fit our dataset (Log-Likelihood test, LR=37.6,  
338  $p=8.7e-10$ ). We also validated our model by ensuring that normalized residuals plotted against  
339 fitted values and factors did not show inhomogeneity.

340

341 Finally, we investigated whether it was also possible to extract stimulus-reward values  
342 using population decoding methods. Here, we applied support vector machine (SVM)  
343 algorithms with Gaussian kernel on the ERP signals recorded from 47 randomly selected  
344 channels. This procedure was performed to extract S1 and S2 values using the average ERP  
345 amplitude during time bins  $t_1$  and  $t_2$ , respectively, for each trial and each predictor (recording  
346 sites). We used the ERP activity of 10 randomly selected trials for each S1 or S2 values (for a  
347 total of 50 trials). Readout performances were extracted by randomly selecting trials and  
348 performing all computations 100 times. We then averaged the decoding performance and  
349 compared it with a set of 1000 randomly-generated permutations.

350

### 351 *Experimental Design and Statistical Analysis*

352 Three adult male rhesus macaques (*Macaca mulatta*) were used in this study.  
353 Recordings in OFC and MFC were made in each monkey before and after amygdala lesions.  
354 This means that each monkey served as its own control. Statistical comparisons (OFC vs.  
355 MFC, PreOp vs. PostOp, ERPs vs. single neurons) were performed at the level of the  
356 population as well as for each subject when possible (see above). For count-based data  
357 statistics we used chi-square tests and where appropriate, ANOVAs, Kruskal-Wallis or  
358 permutation tests for continuous data.

359

360 **RESULTS**

361

362 ***Task and Behavioral performance***

363 Three monkeys were trained to perform a two-choice reward-guided task for fluid  
364 rewards (see Methods, **Fig. 1A**). On each trial, monkeys had to choose one of two visual  
365 stimuli, associated with different amounts of reward, that were sequentially presented. Stimuli  
366 were randomly selected from a total of ten stimuli, each one associated with a fixed amount of  
367 fluid (0, 0.1, 0.2, 0.4 or 0.8 ml, two stimuli for each quantity, **Fig. 1A**).

368 Behavioral performance during the task has been described in detail elsewhere  
369 (Rudebeck, et al., 2013). In brief, each monkey chose the stimulus associated with the  
370 greatest amount of reward on nearly every trial (>95%). Bilateral excitotoxic lesions of the  
371 amygdala did not alter monkeys' performances; monkeys continued to select the stimulus  
372 associated with the greatest amount of reward on more than 95% of trials. Although it might  
373 seem counterintuitive, the task was specifically designed, based on prior work (Izquierdo and  
374 Murray, 2007), to ensure that performance would not be affected by the lesions. This aids the  
375 interpretation of the results; if there had been a behavioral deficit postoperatively it would be  
376 difficult to interpret any postoperative changes in neural activity, as effects could be due to  
377 either the lesion or the change in behavior. In addition, we confirmed that the lesions were  
378 effective in a separate task that required the learning of new stimulus-reward associations  
379 (Rudebeck et al., 2017).

380 Choice response times, defined as the amount of time between the go signal being  
381 delivered and the monkey lifting its hand to make a movement, were modulated by the amount  
382 of reward that the monkeys would receive for making a particular choice ( $p < 0.01$ , see  
383 Rudebeck et al., 2013). Lesions of the amygdala did not consistently alter the effect of value  
384 on monkeys' choice latencies ( $p > 0.3$ ).

385

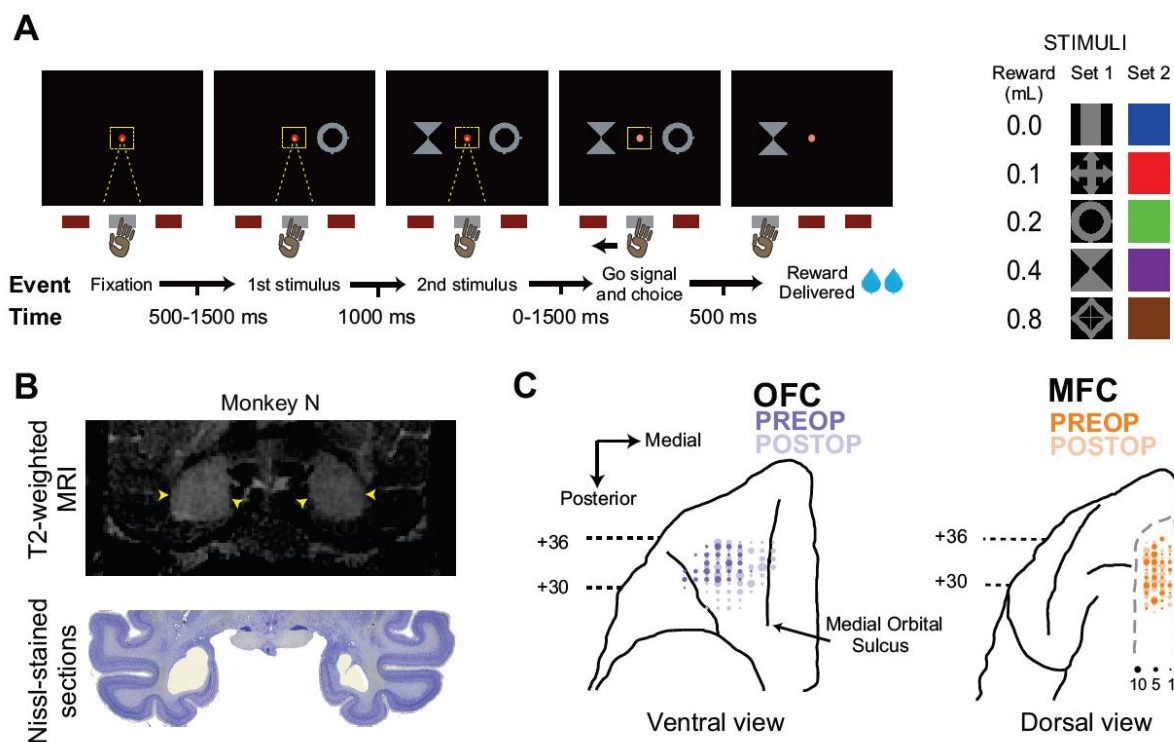

386

387 **Figure 1. Two-choice reward-guided task and recording positions** (a) On each trial, two stimuli  
 388 were sequentially presented on the right and left side of the screen (randomized from trial to trial) while  
 389 monkeys maintained central fixation. After a random delay, the central fixation spot changed color, and  
 390 monkeys were allowed to select with their hand the stimulus of their choice. The reward amount  
 391 associated with the selected stimulus was then delivered. Two sets of stimuli were used (shapes or  
 392 color), each containing 5 different stimuli associated with 0, 0.1, 0.2, 0.4 or 0.8 ml of water. (b) T2-  
 393 weighted MRI (top) and post-mortem Nissl-stained section (bottom) illustrating the extent of the bilateral  
 394 excitotoxic amygdala lesion performed in one representative monkey (see Rudebeck et al., 2013 for a  
 395 complete description). (c) Preoperative (dark colors) and postoperative (light colors) recording locations  
 396 in both the OFC (left) and the dorsal bank of the MFC (right). Dot sizes indicate the number of  
 397 recordings for each site. Antero-posterior values indicate distance in mm relative to the ear bars.

398

399

#### 400 **Encoding of stimulus value in the ERP**

401 While monkeys performed the task, we recorded both single neurons and local field  
 402 potentials in the OFC and MFC. Here, we report the analysis of a total of 366 LFPs (OFC=222  
 403 sites, MFC=144 sites) recorded from the 3 monkeys before bilateral excitotoxic lesions of the  
 404 amygdala (monkey N: 81 OFC, 77 MFC; monkey H: 20 OFC, 56 MFC; monkey V: 121 OFC,  
 405 11 MFC). The presentation of each stimulus (S1 or S2) was associated with a strong ERP  
 406 response at both OFC and MFC recording sites (**Fig. 2A,D**). The early visual responses  
 407 induced by the presentation of S1 were followed by two main components: a negativity  
 408 peaking around 250 ms (average  $\pm$  std, OFC =  $274.4 \pm 28$  ms; MFC =  $259.4 \pm 21$  ms) followed

409 by a late positivity around 400 ms (OFC =  $433 \pm 52$  ms; MFC =  $411.6 \pm 48$  ms). Both the early  
410 negativity and late positivity were significantly earlier in the MFC compared to the OFC (KW  
411 test; negativity:  $H=21.04$ ,  $p=4.49e-6$ ; positivity:  $H=15.46$ ,  $p=8.43e-5$ ). The presentation of S2  
412 elicited similar ERP responses to those following S1.

413

414 To characterize the relationship between stimulus values and the different components  
415 of the ERP responses, we performed a sliding hierarchical ANOVA based on single-trial  
416 responses around the presentation of both S1 and S2 (see Methods). Stimulus value coding  
417 was found in both OFC and MFC ERPs, in particular at the time of the described early  
418 negativity and later positivity of the ERP responses (**Fig. 2B**). No difference in the latency of  
419 value coding between OFC and MFC was found for the encoding of S1 values (average  $\pm$  std,  
420 OFC =  $282.4 \pm 102$  ms; MFC =  $275.9 \pm 121$  ms; KW test,  $H=0.03$ ,  $p=0.8606$ ). However, S2  
421 value was encoded earlier in OFC compared to MFC (average  $\pm$  std, OFC =  $237.7 \pm 106$  ms;  
422 MFC =  $278.7 \pm 129$  ms; KW test,  $H=8.47$ ,  $p=0.0036$ ).

423 To further quantify the contribution of OFC and MFC to stimulus reward-value coding,  
424 we looked at the proportion of sites encoding each factor during 3 time periods around  
425 stimulus presentation (Reference period: -1 to 0 s; S1 period: 0 to 1s; S2 period: 1 to 2 s, all  
426 relative to S1 onset, **Fig. 2C**). During the S1 period, the encoding of S1 values was observed  
427 at more OFC sites than MFC sites (OFC=118/222, 53.15%; MFC=62/144, 43.05%;  $\chi^2=3.56$ ,  
428  $p=0.059$ ). A similar pattern was seen during the S2 period (OFC=129/222, 58.1%;  
429 MFC=58/144, 40.2%;  $\chi^2=11.11$ ,  $p=0.0009$ ). However, only monkeys H and N displayed a  
430 consistent difference between areas for S1 and S2 values (**Fig. 2D**). No differences were  
431 observed in monkey V, although this is likely due to the small number of recorded sites in the  
432 MFC ( $n=11$ ). Finally, a small percentage of sites also encoded the value of S1 during the S2  
433 period, and again this was higher in OFC (OFC=20.7% and MFC=9%,  $\chi^2=7.988$ ,  $p=0.0047$ ,  
434 **Fig. 2C**). It should be noted that S1 remained on the monitor screen at the time of S2  
435 presentation. The percentage of sites that coded S1 value during the S2 period was  
436 consistently higher in the OFC than the MFC of all three monkeys (**Fig. 2D**).

437 Recording sites showing an encoding of the value of S1 in the ERPs during S1 period  
438 were highly likely to encode the value of S2 during the S2 period in both the OFC ( $n=90/118$ ,  
439 76.3%) and the MFC ( $n=33/62$ , 53.2%). The encoding of both S1 and S2 values in similar sites

440 was significantly greater in the OFC than the MFC ( $\chi^2=8.939$ ,  $p=0.0028$ ). Qualitative  
441 inspection of the data did not reveal any topological differences related to stimulus value  
442 coding across the anatomical extent of either OFC or MFC.

443 Importantly, the encoding of reward values can also be extracted using population  
444 measures, by applying nonlinear Support Vector Machines (SVM) with a Gaussian kernel.  
445 Both OFC and MFC populations discriminated S1 values when the stimulus was presented  
446 (OFC: decoding rate  $\pm$  std =  $60.9\pm 11.1$  %,  $p=0.001$ ; MFC: decoding rate =  $49.4\pm 10.4$  %,  $p=0.001$ ;  
447 average permutation chance level being 20%), with higher decoding performance in  
448 the former (KW test,  $H=45.92$ ,  $p=1.23e-11$ ). A significant discrimination of S2 values was also  
449 observed (OFC:  $58\pm 10.5$  %,  $p=0.001$ ; MFC:  $47\pm 9.5$  %,  $p=0.001$ ), again with better  
450 performance in the OFC population than the MFC one (KW test,  $H=47.2$ ,  $p=6.35e-12$ ).

451 Additional analyses revealed that the side on which the stimulus was presented  
452 (randomized from trial to trial, see Methods) explained a sizable proportion of the ERP  
453 responses (**Fig. 2C**). While there was no apparent difference between OFC and MFC during  
454 S1 presentation (OFC=55.8% and MFC=63.8%,  $\chi^2=2.33$ ,  $p=0.13$ ), we found significant  
455 differences during S2 presentation (OFC=59.9% and MFC=44.4%,  $\chi^2=8.40$ ,  $p=0.0037$ ).  
456 However, large discrepancies between monkeys, both during S1 (monkey H: OFC=9/20,  
457 MFC=21/56; monkey N: OFC=76/81, MFC=71/77; monkey V: OFC=39/121, MFC=0/11) and  
458 S2 period (monkey H: OFC=6/20, MFC=12/56; monkey N: OFC=75/81, MFC=50/77; monkey  
459 V: OFC=52/121, MFC=2/11), mean that this result should be treated with caution. Contrary to  
460 the encoding of stimulus value, the modulation of the ERP by the stimulus side was almost  
461 exclusively observed during the initial ERP responses (stimulus side discrimination peaked at  
462 225 ms and 215 ms after S1 onset for OFC and MFC respectively).

463 We also found that the encoding of the identity of S1 or S2, either color or shape stimuli,  
464 was only apparent in the OFC (S1=33/222, 14.8%; S2=34/222, 15.3%). Only ~5% of sites in  
465 MFC signaled stimulus identity (S1=8/144, 5.5%; S2=7/144, 4.8%). This was lower than in  
466 OFC ( $\chi^2>7.6$ ,  $p<0.0058$ ) and also no different to chance levels.

467 In summary, these analyses of the ERPs from OFC and MFC reveal that: 1) OFC  
468 exhibited more prevalent and reliable encoding of stimulus-reward values compared to MFC;  
469 2) stimulus location modulated the early ERP component in both OFC and MFC; 3) sites in the  
470 OFC and MFC encoding of the value of S1 during the S1 period were highly likely to also



471 encode the value of S2 during the S2 period, and 4) stimulus identity encoding was only  
472 evident in OFC, not MFC.

473

#### 474 ***Comparison of ERPs and single-unit encoding of stimulus value***

475 As reported by Rudebeck et al (2013), single units recorded in both OFC and MFC  
476 during performance of the task encoded stimulus values, i.e., the anticipated value of the  
477 reward outcome associated with a stimulus. Here, we investigated whether ERPs encoding  
478 stimulus values were more likely to be recorded on electrodes where the spiking activity of  
479 single neurons also encoded stimulus values. In total, 83.3% and 87.5% of analyzed LFP sites  
480 in OFC and MFC respectively (OFC=185/222 and MFC=126/144 sites) contained at least one  
481 well-isolated and simultaneously recorded single neuron. When we considered only these  
482 sites, similar effects to the ones previously described were found for the percentage of sites  
483 showing ERP encoding of S1 and S2 value (S1 value during S1 period, OFC=50.8% and  
484 MFC=42.06%; and S2 value during S2 period, OFC=58.38% and MFC=39.68%). We then  
485 looked at whether single neurons simultaneously recorded at these sites also encoded  
486 stimulus values. We found that single neurons encoding either the value of S1 (OFC=73/185  
487 and MFC=36/126 neurons) or S2 (OFC=58/185 and MFC=22/126 neurons) were no more  
488 likely to be recorded at sites where ERPs also represented stimulus values. This was true for  
489 both for S1 (OFC=37/73, 50.7% and MFC=17/36, 47.2%) and S2 (OFC=37/58, 63.8% and  
490 MFC=9/22, 40.9%). None of these proportions were greater than expected by chance  
491 (permutation tests  $p > 0.18$ ). We found a similar pattern of results when we compared the  
492 explained variance related to S1 and S2 values encoded by either single neurons or ERPs (S1  
493 value: OFC,  $r=0.08$ ,  $p=0.62$ ; MFC,  $r=0.15$ ,  $p=0.57$ ; S2 value: OFC,  $r=0.25$ ,  $p=0.13$ ; MFC,  
494  $r=0.32$ ,  $p=0.44$ ). Therefore, our findings demonstrate that there is no direct relationship  
495 between the encoding of value in single neurons and ERPs simultaneously recorded at the  
496 same site in this task.

497

498

499

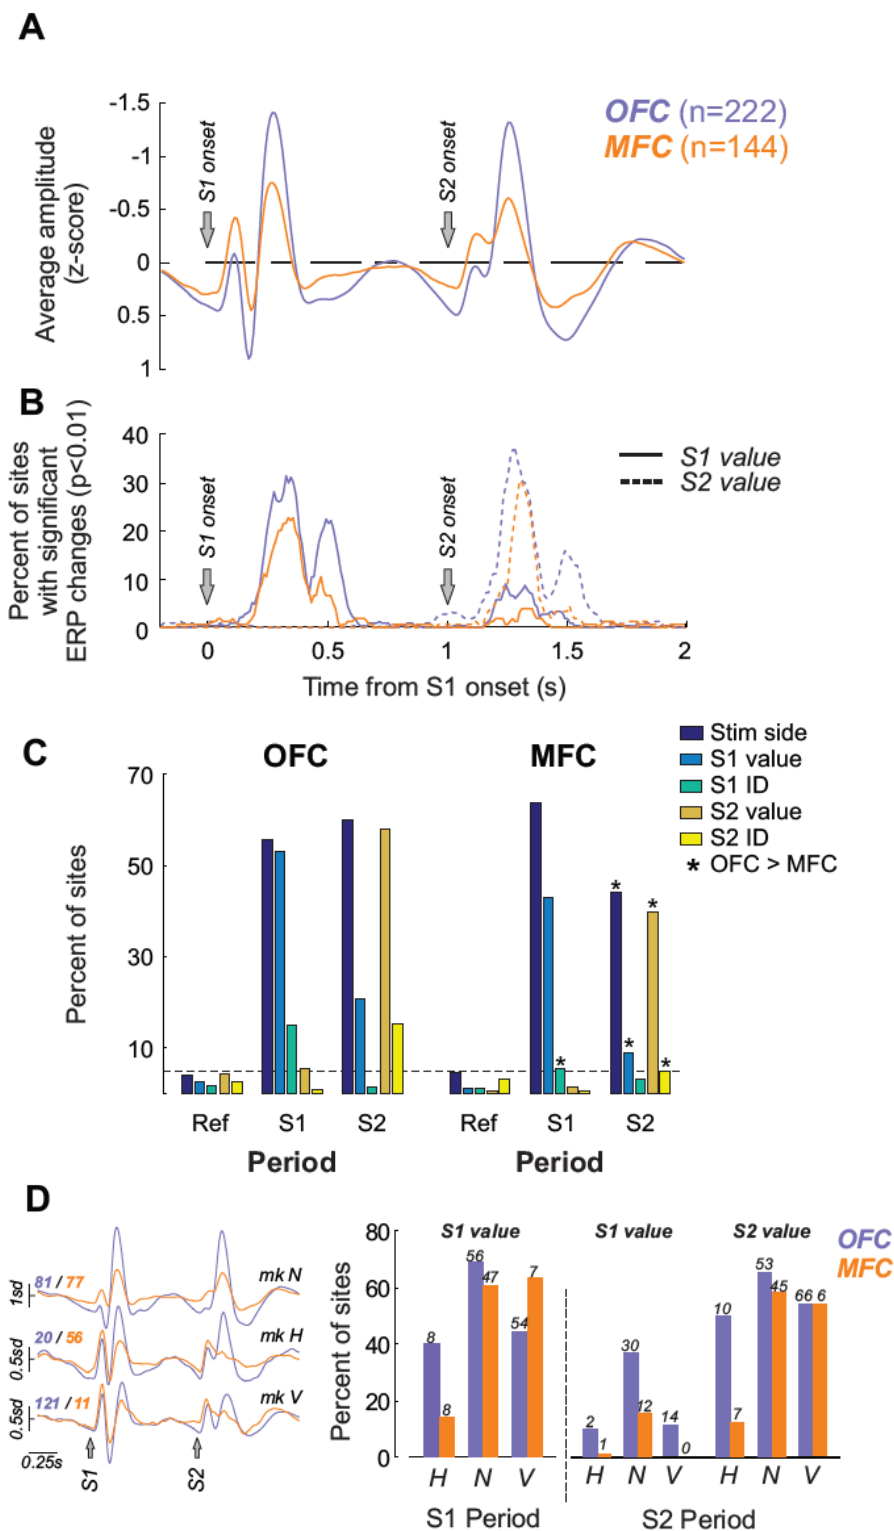

500

501 **Figure 2. Stimulus-reward modulation of ERPs in the OFC and MFC** (a) Grand average normalized  
 502 ERP responses induced by the presentation of S1 and S2 in the OFC (purple) and MFC (orange).  
 503 Black lines indicate significant differences in power between OFC and MFC (KW test,  $p < 0.01$ ). (b)  
 504 Time-resolved percentage of significant sites (hierarchical ANOVA thresholded at  $p < 0.01$ , see

505 Methods) encoding either S1 (solid lines) or S2 values (dashed lines) in both OFC and MFC. (c)  
506 Percentage of sites in the OFC (left) and MFC (right) showing a significant effect of one of the factors in  
507 the hierarchical ANOVA for the 3 different time periods (Ref: -1 to 0 s; S1: 0 to 1 s; S2: 1 to 2 s). Stars  
508 indicate a significant difference between OFC and MFC for the factor considered (Chi-square tests,  
509  $p < 0.05$ ). (d) Individual monkeys' normalized ERP responses (left) and percentage of sites in the OFC  
510 and MFC showing a significant effect of S1 and S2 values either during S1 or S2 periods (right).  
511 Numbers on top of bars indicate the numbers of significant sites. H, N and V represent the three  
512 monkeys.

513

#### 514 ***Population encoding of choices during stimuli presentation***

515 To further explore how reward-value signals in OFC and MFC might contribute to choice  
516 behavior, we applied multiple linear regressions to decode monkeys' choices on each trial from  
517 ERP population activity vectors in both regions (see Methods and **Fig. 3**). Here when we refer  
518 to the choice, we mean the option, either S1 or S2 that the monkey will subsequently choose  
519 on each trial. Linear classifiers were trained on a subset of trials to discriminate the 2  
520 categories: choosing S1 (=1) or choosing S2 (=−1). The training set contained 2 instances of  
521 each of the 14 possible S1-S2 pairs; the testing set contained 1 instance of each (total number  
522 of trials used was 48). This procedure was performed in order to retrieve *a posteriori* the  
523 classifier's performance for each trial type without any bias in the number of their occurrences.  
524 Note that neither information concerning the identity of the different pairs, nor the value of S1  
525 or S2, was given to the classifiers; only the chosen stimulus (S1 or S2) was used. It is also  
526 important to keep in mind that monkeys' choices in this task are entirely based on the reward  
527 values associated with the different stimuli. Because monkeys nearly always chose the  
528 stimulus associated with the highest amount of reward, fully disentangling value and choice-  
529 related signals is beyond the scope of this study.

530 Decoding monkeys' choices was studied here using ERP population activity vectors  
531 combining sites from all monkeys. Due to our trial number requirement, the total number of  
532 available recording sites for the different monkeys varied in both the OFC (monkey H=2,  
533 monkey N=51, monkey V=59 sites) and MFC (monkey H=8, monkey N=35, monkey V=3 sites)  
534 populations. As a result, most of the sites included in the OFC population were recorded from  
535 two monkeys (N and V), whereas most sites included in the MFC population were recorded  
536 from one monkey (N).

537 This analysis showed that LFPs in both OFC and MFC represented which option  
538 monkeys would choose on a trial-by-trial basis (**Fig. 3A, B**). This encoding was evident during

539 both S1 and S2 presentations, typically at the time of the late ERP components previously  
540 described as associated with stimulus-reward values (see for comparison **Fig. 2A, B**). The  
541 different stimulus pairs presented on each trial also affected the performance of the classifiers  
542 trained on the OFC and MFC data. Notably, the classifiers' choice prediction evolved as the  
543 stimuli were sequentially presented and the predicted choice often matched the actual choice,  
544 at least after both stimuli were presented (**Fig. 3B**).

545 To better understand the dynamics of these signals, we looked at how monkeys used  
546 the learned statistics of the task to augment their decisions. At the time of S1, monkeys didn't  
547 have any information about the upcoming S2 value, but given that monkeys had significant  
548 experience with the task, it is likely that they were using the value of S1 to predict S2. This is  
549 possible in the present task because the uncertainty about the upcoming S2 value varied with  
550 the value of S1. For example, if the value of S1 was 0.2 ml on a given trial, there was a 50%  
551 chance that S2 value will be greater or lower (i.e. the maximum uncertainty in this task). On the  
552 other hand, if the value of S1 was 0 or 0.8 ml, there was no uncertainty about the following  
553 choice. Alternatively, if S1 was a stimulus associated with 0.1 or 0.4 ml this was associated  
554 with an intermediate level of uncertainty, respectively a 66.6% or 33.3% chance that S2 value  
555 will be greater than S1 (for full information on pairs, see Methods).

556 Taking the choice uncertainty into account we observed that the decoding performance  
557 of the decision from OFC population activity during the S1 period was strongly correlated with  
558 the estimated optimal choice probability at that time (**Fig. 3C**). A similar relationship was  
559 observed for the MFC population. These analyses therefore reveal that monkeys were biasing  
560 their potential choices on each trial based on the value of the first stimulus that was presented.  
561 Notably, the fact that we were able to significantly decode monkeys' choices during S1 does  
562 not imply that the coding accurately predicted the subsequent choice. Although, knowledge  
563 about the task structure might be an efficient strategy to maximize reward, by reducing the  
564 time before reward, it might result in an incorrect prediction and a planned motor response  
565 associated with a lower value option. This planned response would need to be updated if a  
566 higher value option is presented second. Indeed, careful inspection of Figure 3A shows that  
567 strong encoding of S1 choice was reversed when the less likely S2 stimulus were presented,  
568 violating monkeys' expectation (notably when S1/S2=0.1/0 ml and S1/S2=0.4/0.8 ml, see also  
569 **Fig. 3B**).

570 Following the presentation of S2, both OFC and MFC classifiers reached better overall  
571 performance in predicting monkeys' actual choices (**Fig. 3A, B**). However, differences were  
572 observed between the two areas. In particular, the decoding accuracy from the OFC  
573 population appeared linearly scaled with the stimulus value difference (**Fig. 3D**). This was not  
574 the case for the MFC. Instead, the estimated probability of choosing mostly discriminated the 2  
575 possible choices in a step-wise manner (at least when the decoding accuracy reached  
576 significance), without being affected by the difference in value between the stimuli. This is  
577 reflected by significantly higher accuracy levels in the MFC compared to the OFC in 6 different  
578 stimulus pairs (highlighted in **Fig. 3D**). Also, more pairs of stimuli were significantly decoded  
579 from the MFC than the OFC population after S2 presentation (time bin t<sub>2</sub>, OFC=5/14 and  
580 MFC=11/14 significantly decoded pairs;  $\chi^2=5.25$ ,  $p=0.02$ ; **Fig. 3B** right panel).

581 The very low number of sites in some individual subjects (e.g. monkey H: OFC=2 and  
582 MFC=8; monkey N: MFC=3 sites) prevented us from confirming the robust existence of these  
583 effects in all subjects. As shown in **Fig. 5B** (top row), the choice decoding accuracy from the  
584 two remaining monkeys in OFC revealed large inter-individual variability. Ultimately, the choice  
585 classifiers could only be tested using the MFC recordings of monkey N, meaning that the  
586 effects reported should be treated with caution.

587

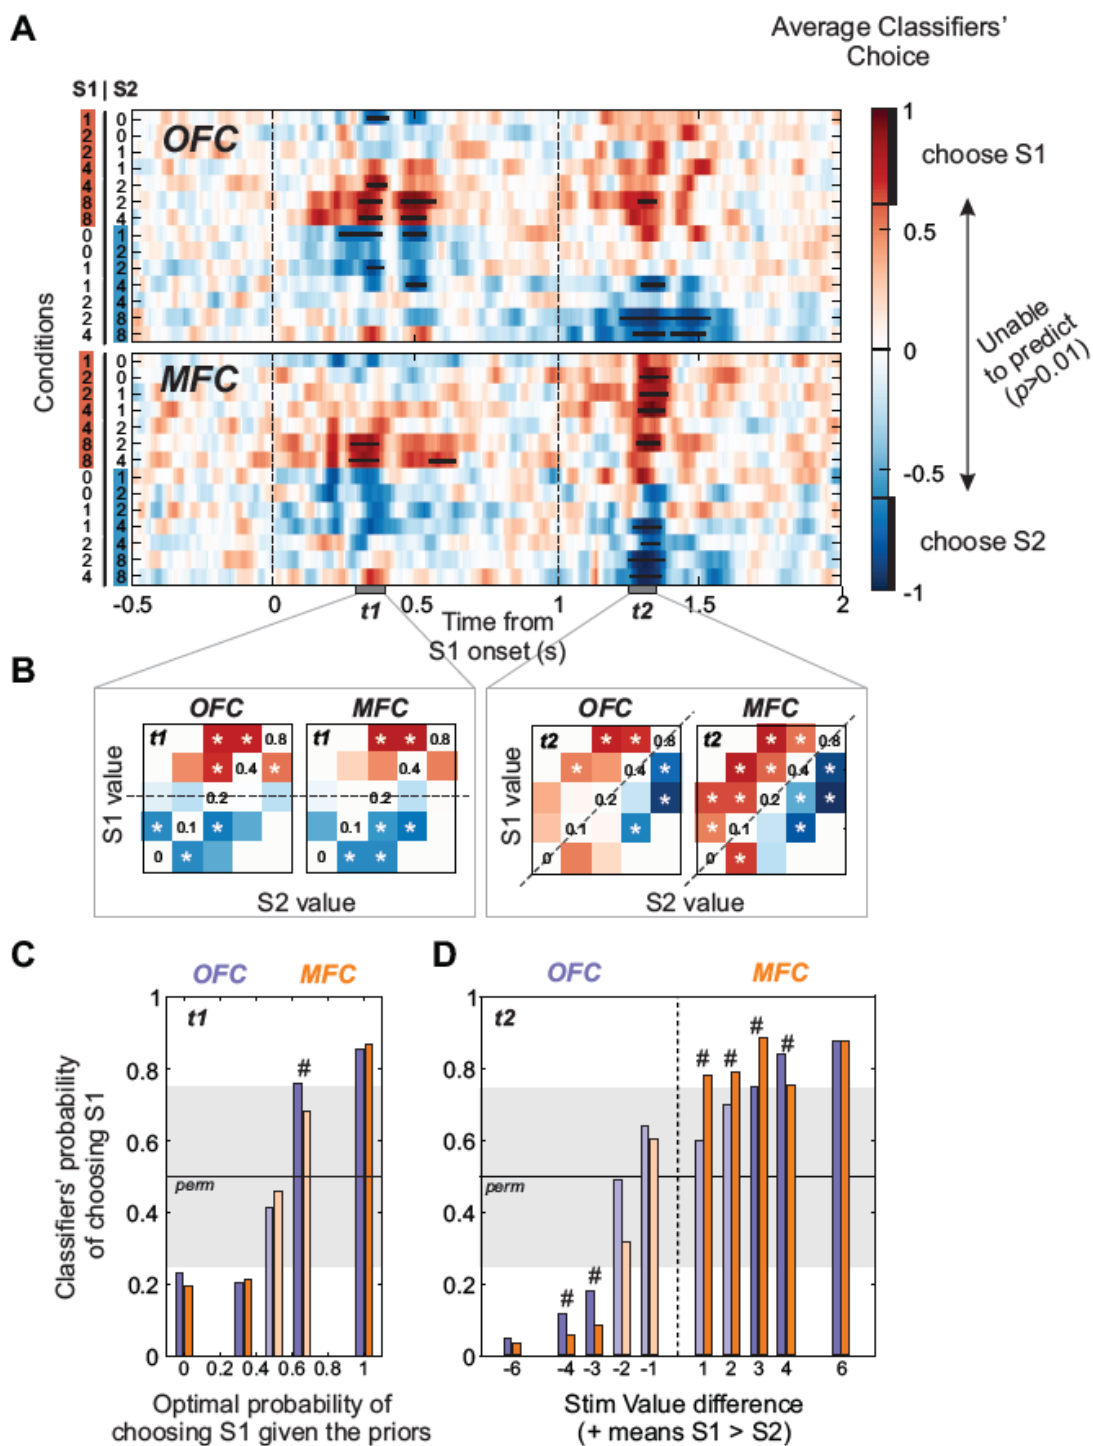

588  
589  
590  
591  
592  
593  
594  
595

**Figure 3. Population encoding of choices during stimuli presentation** (a) Average classifiers' choice performance (red=S1 and blue=S2; a value of 1 or -1 means always choosing S1 or S2 respectively) for each individual pairs of stimuli (labeled as *Conditions*, y-axis) over time (x-axis). Black bars represents a significant statistical preference for choosing S1 or S2 based on permutation testing (threshold at  $p < 0.01$  for at least 6 consecutive time bins). (b) Time bin averages (for t1 and t2) of classifiers' choices in each condition. Stars indicate significant decoding performance. (c) Average classifiers' probability of choosing S1 during time bin t1 against the optimal probability of such choice

596 given the S1 value and the task design (see Methods). (d) Average classifiers' probability of choosing  
597 S1 during time bin t2 against stimuli value difference. In panel c and d, # indicates significant  
598 differences between OFC and MFC. Gray shading represent the noise level extracted from  
599 permutations. OFC=Purple; MFC=Orange bars. Dark and light colors show significant and non-  
600 significant probabilities respectively.  
601

602 In summary, these analyses demonstrated that the ERPs recorded in the MFC, and to a  
603 lesser extent in OFC, contained information about the impending choice (S1 or S2). Together  
604 with the results on the encoding of value by ERPs, this suggests that LFPs in OFC and MFC  
605 represent distinct but complementary information associated with choice behavior.  
606

### 607 ***Amygdala lesions altered stimulus value coding***

608 Following the acquisition of the preoperative recordings, all 3 monkeys received bilateral  
609 excitotoxic lesions of the amygdala, covering both centromedial and basolateral nuclei (**Fig.**  
610 **1B**). Details regarding the method and extent of the lesions can be found in Rudebeck et al.  
611 (2013). We then recorded LFP signals from 298 and 184 sites postoperatively in the OFC and  
612 MFC respectively (monkey N: 169 OFC and 114 MFC; monkey H: 70 MFC; monkey V: 129  
613 OFC). Postoperatively, the presentation of S1 and S2 elicited both the early negativity and late  
614 positivity observed before the lesion (**Fig. 4A**). S1 elicited an early negativity around 250 ms  
615 (average  $\pm$  std, OFC=268.8 $\pm$ 31 ms; MFC=268.8 $\pm$ 35 ms) and a late positivity after 400 ms  
616 (OFC=425.7 $\pm$ 69 ms; MFC=424.6 $\pm$ 64 ms). Both components were also observed after S2  
617 (negativity: OFC=260.2 $\pm$ 24 ms, MFC=243.9 $\pm$ 32 ms; positivity: OFC= 446.6 $\pm$ 59 ms;  
618 MFC=431.5 $\pm$ 63 ms). Amygdala lesions abolished the latency differences previously observed  
619 between the OFC and the MFC for S1 components (KW test OFC vs. MFC, negativity: H=0.02,  
620 p=0.88; positivity: H=6.3e-4, p=0.98) but not for S2 (negativity: H=27.89, p=1.28e-7; positivity:  
621 H=3.32, p=0.07). Compared to the preoperative recordings, the latency of the different  
622 components was decreased following the amygdala lesion in OFC (KW test PreOp vs. PostOp,  
623 S1 negativity: H=4.29, p=0.038; S1 positivity: H=7.34, p=0.007; S2 negativity: H=11.68,  
624 p=6.3e-4; S2 positivity: H=22.63, p=1.9e-6). This was not the case in the MFC, except for the  
625 S2 negativity (KW test PreOp vs. PostOp, S1 negativity: H=1.23, p=0.27; S1 positivity: H=1.74,  
626 p=0.187; S2 negativity: H=17.88, p=2.35e-5; S2 positivity: H=0.35, p=0.55). Finally, we also  
627 observed a clear overall decrease in the amplitude of the ERP responses in both OFC and  
628 MFC relative to the preoperative recordings (**Fig. 4A**).

629

630 During the S1 period, the encoding of S1 values was still observed at a substantial  
631 number of OFC and MFC sites (OFC=107/298, 35.9%; MFC=37/184, 20.1%), with more sites  
632 in the OFC ( $\chi^2=13.55$ ,  $p=2.32e-4$ ) (**Fig. 4B,C**). Similarly, more sites in the OFC compared to  
633 the MFC encoded S2 values during S2 period (OFC=90/298, 30.2%; MFC=34/184, 18.5%;  
634  $\chi^2=8.18$ ,  $p=0.0042$ ). This difference in proportions of site encoding S1 or S2 value was highly  
635 consistent between monkeys (**Fig. 4D**). More importantly, these proportions were smaller than  
636 before the amygdala lesion, for both S1 value during S1 period (PreOp vs. PostOp, OFC:  
637  $\chi^2=15.42$ ,  $p=8.6e-5$ ; MFC:  $\chi^2=20.18$ ,  $p=7e-6$ ) and S2 value during S2 period (PreOp vs.  
638 PostOp, OFC:  $\chi^2=40.6$ ,  $p=1.8e-10$ ; MFC:  $\chi^2=19$ ,  $p=1.3e-5$ ). This decrease was robust for OFC  
639 sites in the two monkeys during both S1 (PreOp/PostOp, monkey N: 69.1/36.1%; monkey V:  
640 44.6/35.6%) and S2 values (monkey N: 65.4/27.8%; monkey V: 54.5/33.3%). For the MFC,  
641 however, only monkey N showed a decrease in the proportion of sites encoding S1 (PreOp vs.  
642 PostOp, monkey N: 61/20.1%; monkey H: 14.3/20%) and S2 reward-values (monkey N:  
643 58.4/21.9%; monkey H: 12.5/12.8%). Thus, caution needs to be taken when interpreting the  
644 effect of amygdala lesions on the encoding of stimulus-reward value in the MFC, given the  
645 variability between monkeys.

646 Furthermore, only ~5% of sites encoded the value of S1 during the S2 period  
647 (OFC=7.7% and MCC=4.89%,  $\chi^2=1.46$ ,  $p=0.2259$ ). This was lower than pre-operatively in the  
648 OFC (PreOp vs. PostOp,  $\chi^2=18.69$ ,  $p=1.5e-5$ ), and was evident in both monkeys  
649 (PreOp/PostOp, monkey N: 37/9.4%; monkey V: 11.5/5.4%) (**Fig. 4**).

650 Thus, stimulus-reward value encoding by LFPs was reduced following amygdectomy  
651 in both OFC and MFC, but differences in encoding between the areas was maintain (OFC >  
652 MFC encoding of S1 and S2). This pattern of effects is different to the changes we observed in  
653 single neuron encoding of stimulus values, where lesions reduced the difference between OFC  
654 and MFC as a result of diminished encoding in OFC (Rudebeck et al., 2013). These analyses  
655 suggest that amygdala input has different effects on single neuron and LFPs in prefrontal  
656 cortex.

657

658 Postoperatively, stimulus side was encoded at more sites in OFC than in MFC, both  
659 during S1 presentation (OFC=40.9% and MFC=21.2%,  $\chi^2=19.93$ ,  $p=8.01e-6$ ) and S2



660 presentation (OFC=40.2% and MFC=23.3%,  $\chi^2=14.51$ ,  $p=1.39e-4$ ) (**Fig. 4C**). Compared to  
661 before amygdala lesions, fewer sites encoded the side of the stimuli in the OFC and MFC,  
662 during both S1 (PreOp vs. PostOp, OFC:  $\chi^2=11.35$ ,  $p=7.5e-4$ ; MFC:  $\chi^2=61.4$ ,  $p=4.7e-15$ ) and  
663 S2 (PreOp vs. PostOp, OFC:  $\chi^2=19.6$ ,  $p=9.3e-6$ ; MFC:  $\chi^2=16.32$ ,  $p=5.3e-5$ ). Although the  
664 proportions were different between monkeys (as reported preoperatively), the decrease in  
665 coding was consistent across monkeys in the OFC for both S1 (PreOp/PostOp: monkey  
666 N=93.8/62.7%, monkey V=32.2/12.4%) and S2 (monkey N=92.6/63.3%, monkey V=43/10.1%).  
667 This was also true in the MFC for both S1 (monkey H=37.5/21.4%, monkey N=92.2/21.1%)  
668 and S2 (monkey H=21.4/11.4%, monkey N=64.9/30.7%).

669 Finally, we also found a significant decrease in the encoding of the identity of S1 or S2,  
670 either color or shape stimuli, in the OFC (S1=16/298, 5.4%; S2=21/298, 7%; PreOp vs.  
671 PostOp:  $\chi^2>9.19$ ,  $p<0.0024$ ). This coding was still relatively absent in the MFC following the  
672 amygdala lesion (S1=5/184, 2.7%; S2=3/184, 1.6%; PreOp vs. PostOp:  $\chi^2<2.85$ ,  $p>0.09$ ).  
673 Changes following amygdala lesions were consistent across monkeys in the OFC for both S1  
674 (PreOp/PostOp: monkey N=12.3/3.6%, monkey V=17.4/7.8%) and S2 (monkey N=18.5/7.1%,  
675 monkey V=17.4/7.8%). This was also true in the MFC for both S1 (PreOp/PostOp: monkey  
676 H=5.4/4.3%, monkey N=6.5/1.8%) and S2 (monkey H=1.8/2.9%, monkey N=7.8/0.9%).

677

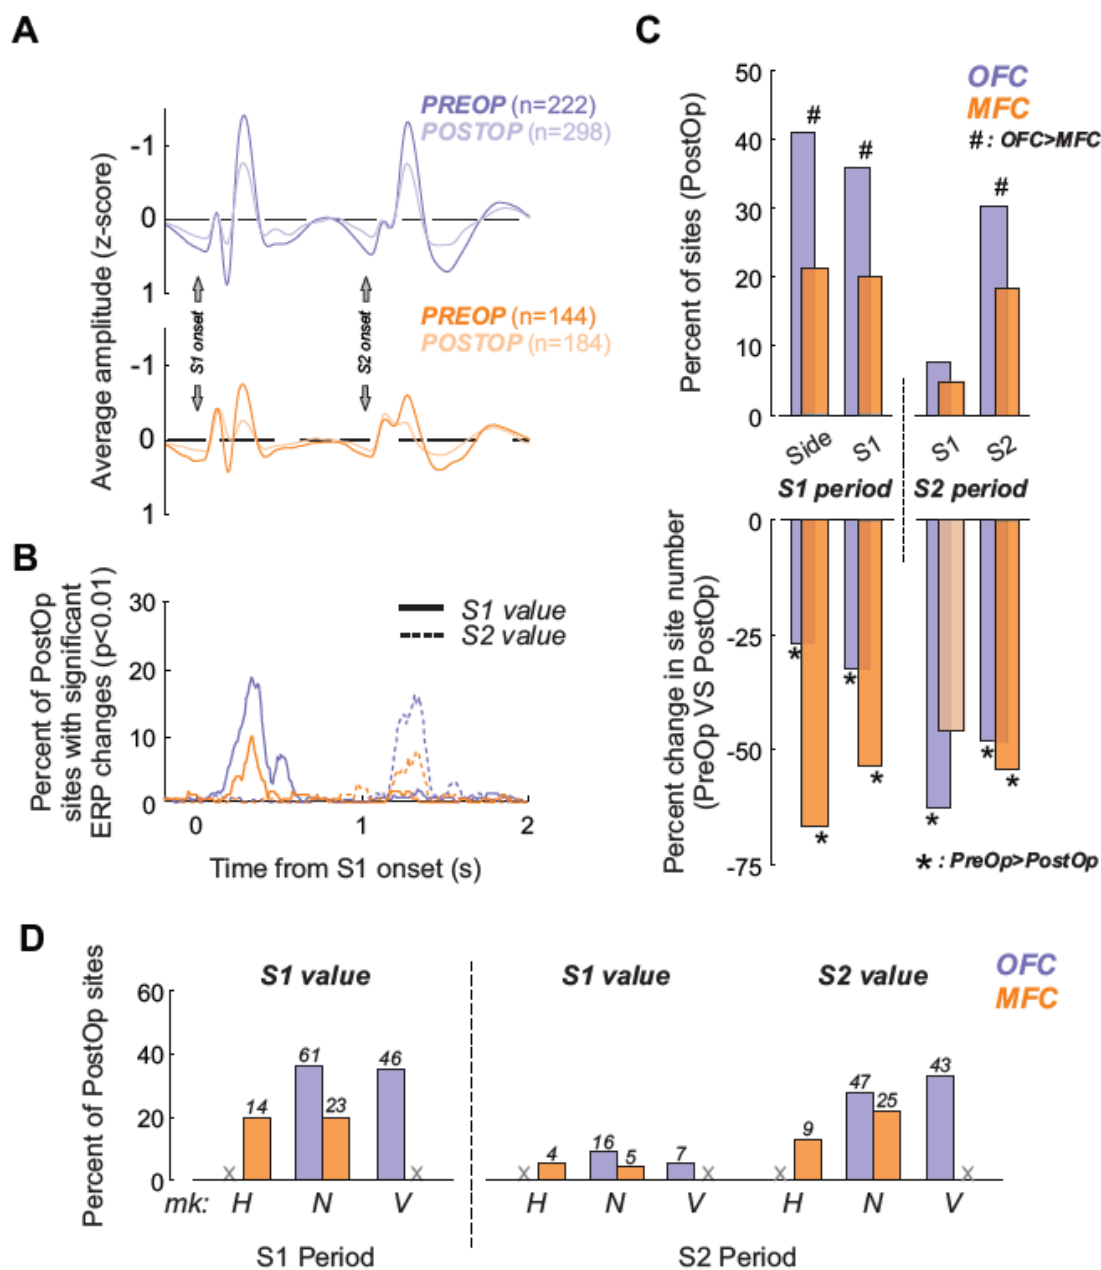

678  
679 **Figure 4. Effect of amygdala lesions on ERP signals** (a) Grand average normalized ERP responses  
680 induced by the presentation of S1 and S2 in the OFC (top panel) and MFC (bottom panel) before and  
681 after amygdala lesions. Black lines indicate significant differences in power between recordings  
682 acquired before and after amygdala lesions (KW test,  $p < 0.01$ ). (b) Time-resolved percentage of  
683 significant sites (hierarchical ANOVA thresholded at  $p < 0.01$ , see Methods) encoding either S1 (solid  
684 lines) or S2 values (dashed lines) in both OFC and MFC. (c) Top panel: Percentage of sites  
685 significantly encoding stimulus side and values in the hierarchical ANOVA during S1 or S2 periods (S1:  
686 0 to 1s; S2: 1 to 2 s) after amygdala lesion. Bottom panel: Percent change in site number  
687 compared to the preoperative data. Hashtags and stars indicate a significant difference between OFC and MFC or  
688 between PreOp and PostOp, respectively (Chi-square tests,  $p < 0.05$ ). (d) Individual monkeys'  
689 percentage and number of sites in the OFC and MFC showing a significant effect of S1 and S2 values  
690 either during S1 or S2 periods. Grey crosses show that no recordings were performed on the given  
691 region of the corresponding monkey (H, N and V represent the three monkeys).

692

693 To summarize, we observed major alterations of the ERPs in both OFC and MFC  
694 following amygdala lesions. Although a significant proportion of sites still encoded the reward-  
695 value associated with the different stimuli, amygdectomy markedly reduced the encoding of  
696 this aspect of the task in both areas.

697

### 698 ***Amygdala lesions abolished the encoding of choices***

699 We applied the same multiple linear regressions method on the postoperative  
700 population ERP activity to investigate whether the encoding of choice was affected by the  
701 removal of the amygdala. Classifiers were trained and tested on 47 randomly selected sites  
702 (total number of available sites exceeding trial number requirements, n=120 OFC and n=86  
703 MFC). Postoperatively, it was not possible to decode monkeys' choices using either OFC or  
704 MFC population ERP activity (**Fig. 5A**). The accuracy of the classifiers to predict monkeys'  
705 choices almost never reached significance in the time-resolved analysis. Similarly, we were  
706 only able to show a significant decoding during time bin  $t_2$  in 3/14 and 2/14 pairs in OFC and  
707 MFC, respectively (see white stars in **Fig. 5A**, bottom panel). Consistent results were observed  
708 in the three subjects (**Fig. 5B**). This reveals the major influence of the amygdala in the  
709 computation of choice-related activity in the MFC. Despite this change in MFC, it is important  
710 to keep in mind that monkeys were still able to perform the task, with similar near-optimal  
711 performance than before lesions.

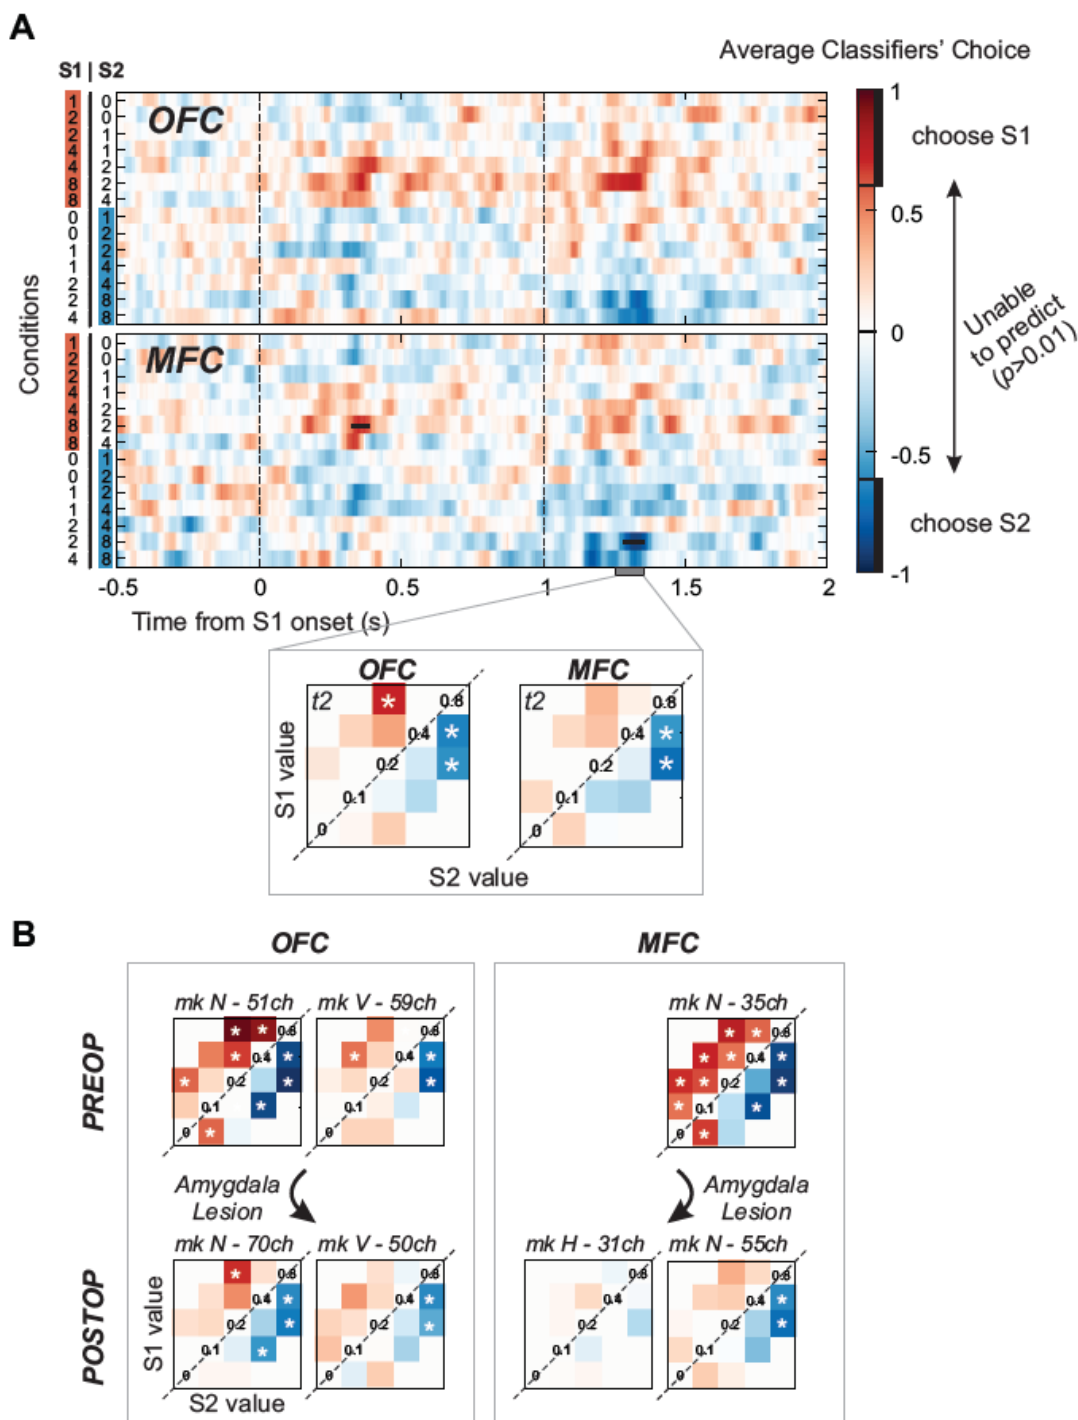

712

713 **Figure 5. Amygdala lesions abolished the encoding of choices in the ERP** (a) Average classifiers'  
 714 choice performance after amygdala lesion (red=S1 and blue=S2) for each individual pairs of stimuli  
 715 (labeled as *Conditions*, y-axis) over time (x-axis). Black bars represents a significant statistical  
 716 preference for choosing S1 or S2 based on permutation testing (threshold at  $p < 0.01$  for at least 6  
 717 consecutive time bins). Inset at the bottom represents the average choice performance during time bin  
 718  $t_2$ . (b) Average classifiers' choice performance derived from individual monkeys during time bin  $t_2$   
 719 for each S1/S2 pairs and for both OFC (left) and MFC (right) populations, before and after amygdala  
 720 lesions. White stars represent a significant performance for the considered S1/S2 pair ( $p < 0.01$ ).

721

722

723 ***ERPs and single neuron activity convey different information related to choices***

724 Preoperatively, we found that choice decoding of ERP signals was more accurate in the  
725 MFC compared to OFC (**Figs 3B,C**). Further, our analyses showed that amygdala lesions  
726 almost abolished the encoding differences between OFC and MFC and the ability to decode  
727 the monkey's choices. By contrast, individual neurons in both OFC and MFC are only weakly  
728 tuned to monkeys' choices during this task (Rudebeck et al. 2013), revealing a possible  
729 dissociation between the information carried by single neurons and LFPs. However, different  
730 methods were applied with the two datasets, and it is possible that using population decoding  
731 measures on the single neuronal recordings might reveal other aspects of choice-related  
732 signaling. We therefore applied the same decoding analyses to both measures of neural  
733 activity (see Methods). As before, the number of predictors (ERP sites or neurons) was similar  
734 to avoid potential nonspecific biases of classifiers' performance.

735 It was possible to decode monkeys' choice using either single neuron or ERP activity  
736 recorded in OFC or MFC, at least when specific S1/S2 pairs were presented (shown for time  
737 bin t2 in **Fig. 6A**). Overall, classifiers using single neuron activity from either OFC or MFC  
738 reached similar decoding performance to that from ERPs recorded in OFC, although the  
739 significantly decoded pairs differed between the two measures and brain regions. Following  
740 amygdala lesions, we observed a decrease in the classifier's accuracy compared to the  
741 preoperative single neurons recordings; we were unable to decode monkeys' choices in as  
742 many S1/S2 pairs (**Fig. 6B**, bar plot). This occurred in both MFC and OFC. Interestingly,  
743 lesions were not simply associated with decreased classifier performance; a significant  
744 increase in performance was observed in a few S1/S2 pairs (4 and 2 pairs for OFC and MFC  
745 respectively; see upward arrows in **Fig. 6A**, bottom panel). This analysis indicates that the  
746 information contained in single neuron and ERP populations was differentially affected by  
747 amygdectomy.

748 To statistically compare whether the overall choice coding strength was different in the  
749 different neural signals and/or modulated following amygdala lesions, we fitted a mixed-effect  
750 logistic regression to the output from the different classifiers (see Methods). Categorical fixed-  
751 effect factors included recording types (single neurons vs. LFPs), areas (OFC vs. MFC) and

752 surgery (PreOp vs. PostOp). S1/S2 pairs were included as a random-effect factor, allowing  
753 only changes in the intercept (i.e. choosing more S1 or S2 depending on their values). The  
754 model results are summarized in **Fig. 6C**. All interactions survived model selection and were  
755 statistically significant (Type x Area:  $t_{(104,1)}=11.71$ ,  $p=1.03e-20$ ; Type x Surgery:  $t_{(104,1)}=-5.16$ ,  
756  $p=1.1e-6$ ; Area x Surgery:  $t_{(104,1)}=-3.25$ ,  $p=1.5e-3$ ). The three-way interaction (Type x Area x  
757 Surgery) also remained in the best model ( $t_{(104,1)}=-6.13$ ,  $p=1.6e-8$ ), highlighting the existence of  
758 a strong dissociation between the factors considered. Post-hoc comparisons using a threshold  
759 at  $p<0.01$  revealed that: 1) choices were more strongly encoded by single neurons compared  
760 to ERPs in the OFC, whereas the opposite was true for the MFC (**Fig. 6C**). 2) Choice encoding  
761 was also significantly greater in MFC than OFC, but only for ERPs, not single neurons (**Fig.**  
762 **6C**). 3) Amygdala lesions significantly reduced the performance of the classifiers on both  
763 single neurons and ERPs, although the effect was more pronounced for ERPs (relative to that  
764 for single neurons) and in the MFC populations (relative to OFC). In summary, amygdala  
765 lesions differentially affected choice coding in OFC and MFC at the level of single neurons and  
766 ERPs. The most prominent change was the reduction in spike encoding of choices in OFC and  
767 the decrease ERP encoding of choices in MFC.

768

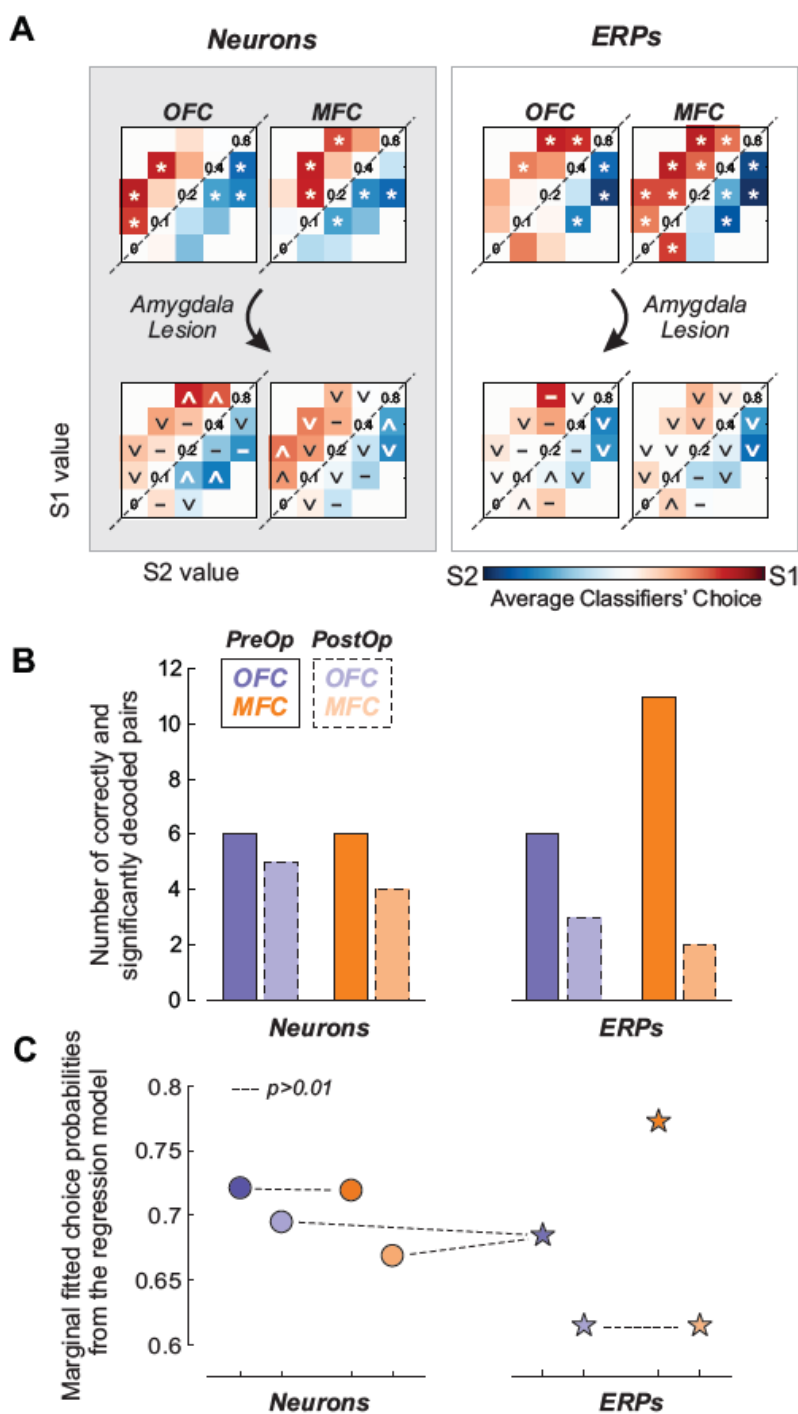

769  
770  
771  
772  
773  
774  
775  
776  
777  
778

**Figure 6. Single neurons and ERPs differences in the encoding of choices** (a) Average classifiers' choice performance during time bin  $t_2$  for each S1/S2 pairs and for both single neuron (left) and ERP (right) populations. White marks indicate a significant decoding performance for the considered S1/S2 pair (stars in PreOp, increase / null / decrease marks in PostOp). Marks for PostOp represent significant (increase or decrease signs) and non-significant changes (dash) when compared to the PreOp populations. (b) Number of significantly and accurately decoded S1/S2 pairs for the different population considered (c) Overall choice probabilities extracted from the mixed-effect logistic regression for each population. Non-significant post-hoc comparisons are represented by dash lines ( $p > 0.01$ ). Conventions as in previous figures.

779 **DISCUSSION**

780 Here we analyzed the local field potentials recorded in OFC and MFC of monkeys  
781 engaged in a task where they chose between two sequentially presented stimuli associated  
782 with different sized fluid rewards on each trial. Before lesions of the amygdala, ERPs in OFC,  
783 and to a lesser extent in MFC, encoded the reward value of the two stimuli presented (**Fig. 2**).  
784 Furthermore, if a site encoded the value of S1 it was highly likely to encode the value of S2.  
785 This closely matched findings from our previously published single neuron recordings. Despite  
786 this correspondence, we found that there was no direct relationship between the encoding of  
787 value by single neurons and ERPs simultaneously recorded on the same electrode. We then  
788 looked at how ERPs encoded the choices that the monkeys would make on each trial. We  
789 found that ERPs recorded in MFC, and to a lesser extent in OFC, contained relevant  
790 information about the upcoming choices that monkeys would make (**Fig 3**). Taken together,  
791 the findings indicate that local field potentials in OFC and MFC represent the relevant  
792 information to make adaptive and optimal decisions.

793 Removing amygdala input to OFC and MFC strongly reduced ERP encoding of stimulus  
794 reward value in both areas (**Fig. 4**). It also decreased the encoding of monkey's choices. This  
795 was most apparent in MFC where the lesions completely abolished choice-related signals  
796 encoding (**Fig. 5**). When we compared the effects of lesions on ERP and single neuron  
797 encoding of choices, the lesions appeared to mostly affect ERP, not single neuron. This was  
798 especially prominent in MFC (**Fig. 6**). Taken together these data suggest that amygdala inputs  
799 are important for augmenting reward-value and choice signals in PFC, most notably ERP  
800 choice-related signals in MFC.

801  
802 ***Encoding of reward-value and choices in OFC and MFC***

803 Both OFC and MFC have been linked to reinforcement-guided decision making, notably  
804 when monkeys have to choose between different stimuli or courses of action associated with  
805 reward (e.g., Thorpe et al., 1983; Matsumoto et al., 2003; Wallis and Miller, 2003; Amiez et al.,  
806 2006; Kennerley et al., 2006; Walton et al., 2010; Stoll et al., 2016). It has also been  
807 emphasized that encoding in OFC and MFC is not identical (Kennerley et al., 2009, 2011), and  
808 that each area makes distinct contributions to different aspects of decision-making (Rudebeck  
809 et al., 2008; Camille et al., 2011). Here, we observed that both brain structures appeared to



810 reflect stimulus-reward values and the upcoming choices. However, the strength of coding of  
811 each factor differed between OFC and MFC and a clear dissociation was apparent: ERPs in  
812 OFC strongly encoded the reward value associated with the stimuli presented on each trial  
813 whereas ERPs in MFC were more closely aligned to the *product* of value signals, reflecting the  
814 encoding of monkeys' choices. The effect in MFC should, however, be taken with caution as  
815 decoding choice-related signals was performed using a non-homogeneous and limited number  
816 of channels from the different monkeys (see **Fig. 5B**). Nevertheless, this could be related to  
817 our previous observation, where single neuron encoding of the amount of reward associated  
818 with S2 in MFC was more influenced by the value of S1 (i.e., was more akin to a relative  
819 valuation; Rudebeck et al., 2013).

820 Indeed, based on work in humans, encoding of choice in MFC might be expected. MFC  
821 and medial OFC have both been proposed to play a role in the comparison process depending  
822 on the context (Rushworth et al., 2012). In addition, MFC is critical for combining multiple  
823 variables important for the decision processes, including both costs and benefits (Rudebeck et  
824 al., 2006; Kennerley et al., 2009; Stoll et al., 2016). Hence, it has been argued that the MFC  
825 could represent the value of exploring alternative courses of actions (Kolling et al., 2016).  
826 Although our task doesn't specifically depend on action values, representing which actions  
827 have been performed and their potential value could be a crucial part of deciding whether to  
828 stay engaged in the task.

829 It is important to note that the design of our task and highly consistent choice patterns of  
830 our subjects prevented us from fully disentangling value and choice-related signals (as is the  
831 case in nearly every value-based decision-making task). As noted earlier, this aspect of the  
832 design was necessary to ensure that any alterations in neural activity consequent to the lesion  
833 could be interpreted. Because of this aspect of our study, monkeys' choice information could  
834 be seen as a binary version of the difference in value of both stimuli. Therefore, the  
835 dissociation we observed between OFC and MFC could be linked to the specific way value-  
836 related information is represented in these regions.

837 Nevertheless, both OFC and MFC ERPs contained information about stimulus-reward  
838 values and choices. This observation supports the notion of permeability of information  
839 throughout the PFC. This could be the result of both the anatomical and functional properties  
840 of the PFC. First, strong anatomical connections exist between the different parts of PFC,

841 notably between the OFC and the MFC (Carmichael and Price, 1996). Also, the associative  
842 role that has been attributed to PFC, as well as the broad influence of motivational factors on  
843 this structure, makes it suitable to represent multiple parameters related to value and decisions  
844 (Wallis and Rich, 2011). Our results support the view that OFC and MFC, albeit being tuned  
845 differently by value and choice information, work in unison when deciding between alternatives  
846 in an adaptive and optimal manner.

847

### 848 ***Correspondence between ERPs and single neuron activity***

849 Despite the potential for LFPs to shed light on information processed in PFC, only a  
850 handful of studies have assessed value and/or choice encoding by LFPs in PFC (Morrison et  
851 al., 2011; Hunt et al., 2015; Rich and Wallis, 2016). We found that value encoding in ERP  
852 signals was not predictive of whether a neuron recorded at the same location would encode  
853 value as well. This result is somewhat surprising as it suggests that there are differences in the  
854 type of information carried in these two measures of neural activity, and, ultimately, that they  
855 are not simply the same process looked at from different angles. One simple explanation for  
856 this dissociation is that differences between the two measures (continuous signal vs point  
857 process) mean that it is difficult to truly compare the signals. This could be an especially acute  
858 problem in OFC where spiking activity is typically sparse (e.g. Thorpe et al., 1983). Against  
859 this, however, there have been reports of differences in the type of information signaled  
860 between LFPs and single neuron activity in parts of temporal cortex (Kreiman et al., 2006;  
861 Nielsen et al., 2006) and PFC in particular (Monosov et al., 2008; Lara and Wallis, 2014; but  
862 see Rich and Wallis, 2016), indicating that this may be a valid difference.

863 An alternative explanation relates to the basis of ERP signals. ERPs are commonly  
864 assumed to reflect postsynaptic events of thousands of neurons, depending on the recording  
865 setup. Therefore, ERPs are thought to partly represent the input to a region from other cortical  
866 or sub-cortical regions (Nguyen and Lin, 2014). However, given that many synapses between  
867 neurons are short-range (i.e., within-area), ERPs could contain a mixture of information from  
868 both inputs and outputs of a region (Douglas and Martin, 2004); by contrast, single neuron  
869 activity only reflects the output of a region.

870 While there was a location specific dissociation between single neuron and ERP  
871 encoding of value, at the population level both measures were highly similar (compare

872 example **Fig. 2C** with Fig. 3 in Rudebeck et al., 2013). This close correspondence, however,  
873 was absent for one of our findings: encoding of choice by ERPs in MFC (**Fig. 6**). Given the  
874 basis of the ERP signal noted above, it is possible that MFC receives choice-related signals  
875 from amygdala (**Fig. 6**) or potentially other parts of PFC that require amygdala input, but this  
876 does not result in a strong cascade of activity in individual neurons. Apart from amygdala, such  
877 choice signal could potentially come from medial OFC where comparison related activity has  
878 been reported in both macaques and humans (Boorman et al., 2009; Kolling et al., 2012; Strait  
879 et al., 2014). The lack of single neuron encoding of choices during the present task could be  
880 linked to the relatively low involvement of the MFC and OFC in this task, where values were  
881 already learned. By contrast, if the value of stimuli changed unexpectedly or has to be learned,  
882 this might trigger a cascade of events throughout the PFC, increasing the need for cognitive  
883 control which could potentiate the processing of choice and value information in the MFC and  
884 OFC, respectively. This idea would appear to fit with data from the same subjects showing that  
885 during stimulus-reward learning, single neuron activity in MFC closely matches stimulus values  
886 and is indistinguishable from OFC encoding (Rudebeck et al., 2017).

### 887 888 ***Amygdala influence on reward value and choice coding***

889 We found that amygdala lesions not only strongly affected ERP correlates of stimulus-  
890 reward values and choices, but also the encoding of other parameters such as the stimulus  
891 side or identity (**Fig. 4**). This is different to the effect of amygdala lesions on the activity of  
892 individual neurons, where there was not a significant reduction in the encoding of these  
893 parameters (Rudebeck et al., 2013). A wholesale reduction in ERP amplitude following lesions  
894 could be responsible for the decrease in coding in the different parameters. Yet ERP  
895 amplitudes in OFC postoperatively were still higher than MFC preoperatively, but nevertheless  
896 less tuned to the different factors considered. Therefore, such changes might represent a  
897 specific loss of information as opposed to a nonspecific reduction in signal-to-noise ratio. In  
898 fact, neurons in the amygdala have been shown to reflect both the identity and the location of a  
899 stimulus, possibly related to the role of amygdala in directing attentional processes (Peck et  
900 al., 2013, 2014).

901 Previous studies where functional measures, either single neuron recording or  
902 functional MRI, have been combined with amygdala lesions during reward based tasks have

903 reported changes in encoding in PFC (Schoenbaum et al., 2003; Hampton et al., 2007).  
904 Although our findings are in broad agreement with this previous work in humans and rodents,  
905 the change in choice encoding in MFC that we found is most pertinent to a human fMRI study  
906 detailing the effects of amygdala damage (Hampton et al., 2007). Hampton and colleagues  
907 reported that expected reward signals in MFC (i.e., the outcome of decisions) were reduced in  
908 two humans with amygdala damage performing a reward-guided task. Our data therefore  
909 confirm and extend these findings by showing the dynamic nature of these effects and that  
910 choice signals are abolished irrespective of when the stimuli are presented (decoding on S1 or  
911 S2, **Fig. 5**).

912 Given the strong reciprocal projections between PFC and amygdala (Morecraft and Van  
913 Hoesen, 1998; Ghashghaei et al., 2007), it could be argued that the changes we observed  
914 were the result of the loss of amygdala inputs to the OFC and MFC. This could be supported  
915 by the relatively greater decrease in the encoding of value and choice in ERPs than in single  
916 neurons given that ERPs could reflect inputs to these regions. However, we cannot rule out the  
917 possible influence of other brain regions. For example, the loss of information related to value  
918 and choice in the MFC could be an indirect result of the loss of amygdala inputs to the medial  
919 and lateral OFC, which receive strong projections from the amygdala (Ghashghaei et al.,  
920 2007). Alternatively, thalamic and dopaminergic inputs could play a role in the transmission of  
921 information from the amygdala to the PFC (Williams and Goldman-Rakic, 1998; Timbie and  
922 Barbas, 2015).

923

## 924 **Summary**

925 We recorded ERPs in the OFC and MFC of macaque monkeys while they performed a  
926 reward-based choice task. We found that OFC and MFC carry distinct signals related to  
927 decision-making at the level of single neurons and LFPs. While both single neurons and LFPs  
928 in OFC predominantly encoded stimulus-reward values, ERP signals in MFC were specifically  
929 related to monkey's choices. This correlate of decision-making in MFC was unique in that it  
930 was not seen in the activity of single neurons and it was almost entirely dependent on input  
931 from the amygdala. Given the prominent role of MFC-amygdala interactions in numerous  
932 psychiatric disorders, alterations in choice-related signals in MFC could be used as a marker of  
933 amygdala dysfunction.

## REFERENCES

- Almeida JRC de, Versace A, Mechelli A, Hassel S, Quevedo K, Kupfer DJ, Phillips ML (2009) Abnormal Amygdala-Prefrontal Effective Connectivity to Happy Faces Differentiates Bipolar from Major Depression. *Biol Psychiatry* 66:451–459.
- Amiez C, Joseph JP, Procyk E (2006) Reward encoding in the monkey anterior cingulate cortex. *Cereb cortex* 16:1040–1055.
- Astrand E, Enel P, Ibos G, Dominey PF, Baraduc P, Ben Hamed S (2014) Comparison of classifiers for decoding sensory and cognitive information from prefrontal neuronal populations. *PLoS One* 9.
- Baxter MG, Parker A, Lindner CCC, Izquierdo AD, Murray E a (2000) Control of response selection by reinforcer value requires interaction of amygdala and orbital prefrontal cortex. *J Neurosci* 20:4311–4319.
- Boorman ED, Behrens TEJ, Woolrich MW, Rushworth MFS (2009) How Green Is the Grass on the Other Side? Frontopolar Cortex and the Evidence in Favor of Alternative Courses of Action. *Neuron* 62:733–743.
- Camille N, Tsuchida A, Fellows LK (2011) Double Dissociation of Stimulus-Value and Action-Value Learning in Humans with Orbitofrontal or Anterior Cingulate Cortex Damage. *J Neurosci* 31:15048–15052.
- Carmichael ST, Price JL (1996) Connectional networks within the orbital and medial prefrontal cortex of macaque monkeys. *J Comp Neurol* 371:179–207.
- Douglas RJ, Martin K a C (2004) Neuronal circuits of the neocortex. *Annu Rev Neurosci* 27:419–451.
- Dutta A, McKie S, Deakin JFW (2014) Resting state networks in major depressive disorder. *Psychiatry Res* 224:139–151.
- Einevoll GT, Kayser C, Logothetis NK, Panzeri S (2013) Modelling and analysis of local field potentials for studying the function of cortical circuits. *Nat Rev Neurosci* 14:770–785.
- Felix-Ortiz AC, Burgos-Robles A, Bhagat ND, Leppla CA, Tye KM (2016) Bidirectional modulation of anxiety-related and social behaviors by amygdala projections to the medial prefrontal cortex. *Neuroscience* 321:197–209.
- Floresco SB, Ghods-Sharifi S (2007) Amygdala-prefrontal cortical circuitry regulates effort-based decision making. *Cereb Cortex* 17:251–260.
- Ghashghaei HT, Hilgetag CC, Barbas H (2007) Sequence of information processing for emotions based on the anatomic dialogue between prefrontal cortex and amygdala. *Neuroimage* 34:905–923.
- Hampton AN, Adolphs R, Tyszka MJ, O’Doherty JP (2007) Contributions of the Amygdala to Reward Expectancy and Choice Signals in Human Prefrontal Cortex. *Neuron* 55:545–555.
- Hunt LT, Behrens TEJ, Hosokawa T, Wallis JD, Kennerley SW (2015) Capturing the temporal evolution of choice across prefrontal cortex. *Elife* 4:e11945.
- Izquierdo A, Murray E a (2007) Selective bilateral amygdala lesions in rhesus monkeys fail to disrupt object reversal learning. *J Neurosci* 27:1054–1062.
- Kennerley SW, Behrens TEJ, Wallis JD (2011) Double dissociation of value computations in orbitofrontal and anterior cingulate neurons. *Nat Neurosci* 14:1581–1589.
- Kennerley SW, Dahmubed AF, Lara AH, Wallis JD (2009) Neurons in the frontal lobe encode the value of multiple decision variables. *J Cogn Neurosci* 21:1162–1178.
- Kennerley SW, Walton ME, Behrens TEJ, Buckley MJ, Rushworth MFS (2006) Optimal decision making and the anterior cingulate cortex. *Nat Neurosci* 9:940–947.
- Kolling N, Behrens TEJ, Mars RB, Rushworth MFS (2012) Neural mechanisms of foraging. *Science* 336:95–98.
- Kolling N, Behrens TEJ, Wittmann MK, Rushworth MFS (2016) Multiple signals in anterior cingulate cortex. *Curr Opin Neurobiol* 37:36–43.
- Kreiman G, Hung CP, Kraskov A, Quiroga RQ, Poggio T, DiCarlo JJ (2006) Object selectivity of local

- field potentials and spikes in the macaque inferior temporal cortex. *Neuron* 49:433–445.
- Lara AH, Wallis JD (2014) Executive control processes underlying multi-item working memory. *Nat Neurosci* 17:876–883.
- Matsumoto K, Suzuki W, Tanaka K (2003) Neuronal correlates of goal-based motor selection in the prefrontal cortex. *Science* 301:229–232.
- Monosov IE, Trageser JC, Thompson KG (2008) Measurements of Simultaneously Recorded Spiking Activity and Local Field Potentials Suggest that Spatial Selection Emerges in the Frontal Eye Field. *Neuron* 57:614–625.
- Morecraft RJ, Van Hoesen GW (1998) Convergence of limbic input to the cingulate motor cortex in the rhesus monkey. *Brain Res Bull* 45:209–232.
- Morrison SE, Saez A, Lau B, Salzman CD (2011) Different Time Courses for Learning-Related Changes in Amygdala and Orbitofrontal Cortex. *Neuron* 71:1127–1140.
- Nguyen DP, Lin SC (2014) A frontal cortex event-related potential driven by the basal forebrain. *Elife* 3:e02148.
- Nielsen KJ, Logothetis NK, Rainer G (2006) Dissociation between local field potentials and spiking activity in macaque inferior temporal cortex reveals diagnosticity-based encoding of complex objects. *J Neurosci* 26:9639–9645.
- Oostenveld R, Fries P, Maris E, Schoffelen JM (2011) FieldTrip: Open source software for advanced analysis of MEG, EEG, and invasive electrophysiological data. *Comput Intell Neurosci* 2011:156869.
- Peck CJ, Lau B, Salzman CD (2013) The primate amygdala combines information about space and value. *Nat Neurosci* 16:340–348.
- Peck EL, Peck CJ, Salzman CD (2014) Task-Dependent Spatial Selectivity in the Primate Amygdala. *J Neurosci* 34:16220–16233.
- Pezawas L, Meyer-Lindenberg A, Drabant EM, Verchinski BA, Munoz KE, Kolachana BS, Egan MF, Mattay VS, Hariri AR, Weinberger DR (2005) 5-HTTLPR polymorphism impacts human cingulate-amygdala interactions: a genetic susceptibility mechanism for depression. *Nat Neurosci* 8:828–834.
- Rich EL, Wallis JD (2016) Decoding subjective decisions from orbitofrontal cortex. *Nat Neurosci* 19:973–980.
- Rudebeck PH, Behrens TE, Kennerley SW, Baxter MG, Buckley MJ, Walton ME, Rushworth MFS (2008) Frontal cortex subregions play distinct roles in choices between actions and stimuli. *J Neurosci* 28:13775–13785.
- Rudebeck PH, Mitz AR, Chacko R V., Murray EA (2013) Effects of amygdala lesions on reward-value coding in orbital and medial prefrontal cortex. *Neuron* 80:1519–1531.
- Rudebeck PH, Ripple JA, Mitz AR, Averbeck BB, Murray EA (2017) Amygdala Contributions to Stimulus-Reward Encoding in the Macaque Medial and Orbital Frontal Cortex during Learning. *J Neurosci* 37:2186–2202.
- Rudebeck PH, Walton ME, Smyth AN, Bannerman DM, Rushworth MFS (2006) Separate neural pathways process different decision costs. *Nat Neurosci* 9:1161–1168.
- Rushworth MFS, Kolling N, Sallet J, Mars RB (2012) Valuation and decision-making in frontal cortex: one or many serial or parallel systems? *Curr Opin Neurobiol* 22:946–955.
- Schoenbaum G, Setlow B, Saddoris MP, Gallagher M (2003) Encoding predicted outcome and acquired value in orbitofrontal cortex during cue sampling depends upon input from basolateral amygdala. *Neuron* 39:855–867.
- Stoll FM, Fontanier V, Procyk E (2016) Specific frontal neural dynamics contribute to decisions to check. *Nat Commun* 7:11990.
- Strait CE, Blanchard TC, Hayden BY (2014) Reward value comparison via mutual inhibition in ventromedial prefrontal cortex. *Neuron* 82:1357–1366.
- Thorpe SJ, Rolls ET, Maddison S (1983) The orbitofrontal cortex: Neuronal activity in the behaving monkey. *Exp Brain Res* 49:93–115.

- Timbie C, Barbas H (2015) Pathways for Emotions: Specializations in the Amygdalar, Mediodorsal Thalamic, and Posterior Orbitofrontal Network. *J Neurosci* 35:11976–11987.
- Wallis JD, Miller EK (2003) Neuronal activity in primate dorsolateral and orbital prefrontal cortex during performance of a reward preference task. *Eur J Neurosci* 18:2069–2081.
- Wallis JD, Rich EL (2011) Challenges of Interpreting Frontal Neurons during Value-Based Decision-Making. *Front Neurosci* 5:124.
- Walton ME, Behrens TEJ, Buckley MJ, Rudebeck PH, Rushworth MFS (2010) Separable Learning Systems in the Macaque Brain and the Role of Orbitofrontal Cortex in Contingent Learning. *Neuron* 65:927–939.
- Williams SM, Goldman-Rakic PS (1998) Widespread origin of the primate mesofrontal dopamine system. *Cereb Cortex* 8:321–345.
